# Supplementary material for: Impact of group antenatal care (G-ANC) versus individual antenatal care (ANC) on quality of care, ANC attendance and facility-based delivery: A pragmatic cluster-randomized controlled trial in Kenya and Nigeria
Source: PLoS One. 2019 Oct 2;14(10):e0222177. doi: 10.1371/journal.pone.0222177 (PMC6774470; doi:10.1371/journal.pone.0222177)
Supplement: S1 Data — (CSV) [file pone.0222177.s008.csv]

Country	Case source is DataSet13	0	K
		1	N
record_id	PARTICIPANT STUDY ID
redcap_event_name	Event Name	4_phase_ii_arm_1	4. Phase II
		2_baseline_arm_1	2. Baseline
		1_screening_and_co_arm_1	1. Screening and Consent
		3_follow_up_arm_1	3. Follow Up
screening_data_time	Date and Time of record creation - Data Quality Check
intervention_control_fac	Intervention or control facility	1	Intervention
		2	Control
screening_date	Date of data collection/interview
ga_age	Gestational Age on the day of data collection
ga_determined_by___1	Gestational Age determined by [Umri wa mjamzito unadhamiriwa na] (choice=LMP [Siku ya mwisho ya Hedhi])	0	Unchecked
		1	Checked
ga_determined_by___2	Gestational Age determined by [Umri wa mjamzito unadhamiriwa na] (choice=Ultrasound)	0	Unchecked
		1	Checked
ga_determined_by___3	Gestational Age determined by [Umri wa mjamzito unadhamiriwa na] (choice=Fundal height)	0	Unchecked
		1	Checked
ga_determined_by___4	Gestational Age determined by [Umri wa mjamzito unadhamiriwa na] (choice=Pelvic exam)	0	Unchecked
		1	Checked
edd_date	When is your EDD (Expected Date of Delivery)?
p_eligibility_by_ga	Client eligible by Gestational Age?
language_spoken___1	Able to speak and understand any of the following languages (choice=English)	{REDACTED}
language_spoken___2	Able to speak and understand any of the following languages (choice=Kiswahili)	{REDACTED}
language_spoken___4	Able to speak and understand any of the following languages (choice=Luo)	{REDACTED}
language_spoken___5	Able to speak and understand any of the following languages (choice=Kamba)	{REDACTED}
ga_edd	GA of woman on EDD
screening_age	Age at last birthday [Umri wako]
planning_to_stay_same_place	Are you planning to stay in this area for the next 1 and a half years and continue your antenatal care at this facility? [Una mpango wa kuishi mahala hapa kwa mwaka 1 1/2 ujao na uendelee na malezi yako ya wajawazito kwenye kituo hiki?]	1	Yes [Ndio]
		2	No [La]
planning_to_be_away	Are you planning to be away from home (near this facility) for more than 4 weeks in a row at any time during your pregnancy or more than 3 months in a row in the year after you have your baby? [Una mpango wa kuwa mbali na nyumbani (karibu na kituo hiki)	1	Yes [Ndio]
		2	No [La]
education_level	What is the highest level of education you completed? [Ulihitimu kiwango kipi cha juu cha masomo?]	1	No school [Sikuenda shule]
		2	Primary [Msingi]
		3	Quaranic education only [Masomo ya Quarani pekee]
		4	Secondary [Sekondari]
		5	Post Secondary [Masomo baada ya sekondari]
religion	What is your religion? [Uko katika dini gani?]	{REDACTED}
time_to_reach_fac	How long does it take you to get here using the mode of transportation? [Inakuchukua muda upi kufika hapa ukitumia mbinu hiyo ya usafiri?]
marital_status	What is your current marital status? [Ni ipi hadhi yako ya ndoa sasa hivi?]	1	Married [Olewa]
		2	Single not in union [simo mahusianoni]
		3	Cohabiting [kuishi pamoja]
		4	Separated/divorced [Tengana/ talikiwa]
		5	Widowed [kufiwa]
		6	Never married [sijawai kuolewa]
number_given_birth	How many times have you given birth before? [Umejifungua mara ngapi hapo awali? (pasina kutilia maanani matokeo) ]
group_visit_date	Date of first meeting for the G-ANC cohort [Tarehe na saa ya mkutano wa kwanza wa kikundi chako]
intervention_cohort_ga	Gestational Age of client at next group visit 1
baseline_time_dc	Date and Time of data collection - Data Quality Check
baseline_women_date	Date of data collection/ interview
baseline_women_q1	1. Have you given birth before? [Umewahi kujifungua hapo awali]	1	Yes [Ndio]
		2	No [La]
baseline_women_q2	2. What was the date of your last birth? [Tarehe ya mara yako ya mwisho ya kujifungua ilikuwa ipi?]
baseline_women_q3	3. Did you attend antenatal care during your last pregnancy? [Kwenye ujauzito wako uliopita ulihudhuria kliniki cha kuwapa wajawazito malezi?]	1	Yes
		2	No
baseline_women_q4a	a. I was greeted warmly [Nilisalmiwa kwa furaha]	1	Agree [Nakubali]
		2	Disagree [Nakataa]
		3	Neither agree nor disagree [Sikubali wala kukataa]
baseline_women_q4b	b. I was able to ask questions and they were answered in a way I understood [Niliweza kuuliza maswali na yalijibiwa kwa namna niliyoelewa]	1	Agree [Nakubali]
		2	Disagree [Nakataa]
		3	Neither agree nor disagree [Sikubali wala kukataa]
baseline_women_q4c	c. I learned important information about how to keep myself and my baby healthy [Nilijifunza mambo muhimu namna ya kujitunza pamoja na mtoto wangu kuwa na Afya bora]	1	Agree [Nakubali]
		2	Disagree [Nakataa]
		3	Neither agree nor disagree [Sikubali wala kukataa]
baseline_women_q4d	d. I left antenatal care visits with questions or confused about some things [Nilitoka kwenye kliniki cha wajawazito na maswali au utatanishi katika mambo mengine.]	1	Agree [Nakubali]
		2	Disagree [Nakataa]
		3	Neither agree nor disagree [Sikubali wala kukataa]
baseline_women_q4e	e. The provider did not show me respect or act in respectful ways [Mhudumu hakunipa heshima au kufanya vitu vilivyodhihirisha heshima.]	1	Agree [Nakubali]
		2	Disagree [Nakataa]
		3	Neither agree nor disagree [Sikubali wala kukataa]
baseline_women_q4f	f. During this pregnancy I would be happy to receive care similar to what I received during my last pregnancy [Kwa ujauzito wangu mwingine nitafurahia kupata malezi sawia na niliyoyapata kwenye huu ujauzito uliopita.]	1	Agree [Nakubali]
		2	Disagree [Nakataa]
		3	Neither agree nor disagree [Sikubali wala kukataa]
baseline_women_q4g	g. I would recommend to a friend to go to the same place for antenatal care [Ningependekezea rafiki kuenda mahali pale kwa malezi ya ujauzito.]	1	Agree [Nakubali]
		2	Disagree [Nakataa]
		3	Neither agree nor disagree [Sikubali wala kukataa]
baseline_women_q4h	h. I felt respected [Nilihisi nimeheshimiwa.]	1	Agree [Nakubali]
		2	Disagree [Nakataa]
		3	Neither agree nor disagree [Sikubali wala kukataa]
baseline_women_q4i	i. I had enough time with my provider [Nilipata muda wa kutosha na mhudumu wangu.]	1	Agree [Nakubali]
		2	Disagree [Nakataa]
		3	Neither agree nor disagree [Sikubali wala kukataa]
baseline_women_q4j	j. I am very satisfied with the antenatal care I received [Niliridhika sana kwa malezi ya ujauzito niliyoyapokea.]	1	Agree [Nakubali]
		2	Disagree [Nakataa]
		3	Neither agree nor disagree [Sikubali wala kukataa]
baseline_women_q5	5. Did you experience any problems during previous pregnancies or deliveries? [Ulikumbwa na utata wowote wa kiafya katika ujauzito ziliopita au kujifungua?]	1	Yes [Ndio]
		2	No [La]
		3	Not sure/Dont remember [sina uhakika/ sikumbuki]
baseline_women_q6	6. Where did you deliver your last baby?	1	At home
		2	At a health facility
		3	In transit to a facility
		4	Other
baseline_women_q7	7. Where do you intend to deliver this baby?	1	At home
		2	At a health facility
		3	Not sure/Undecided
		4	Other
baseline_women_q8___1	8. Before this pregnancy did you use any of the following methods to delay or prevent getting pregnant? (choice=Lactational Amenorrhea Method (LAM))	0	Unchecked
		1	Checked
baseline_women_q8___2	8. Before this pregnancy did you use any of the following methods to delay or prevent getting pregnant? (choice=Standard days or rhythm method (cycle beads/calendar/billings method))	0	Unchecked
		1	Checked
baseline_women_q8___3	8. Before this pregnancy did you use any of the following methods to delay or prevent getting pregnant? (choice=Withdrawal)	0	Unchecked
		1	Checked
baseline_women_q8___4	8. Before this pregnancy did you use any of the following methods to delay or prevent getting pregnant? (choice=Condoms)	0	Unchecked
		1	Checked
baseline_women_q8___5	8. Before this pregnancy did you use any of the following methods to delay or prevent getting pregnant? (choice=Pills/Oral contraceptives)	0	Unchecked
		1	Checked
baseline_women_q8___6	8. Before this pregnancy did you use any of the following methods to delay or prevent getting pregnant? (choice=Injectable)	0	Unchecked
		1	Checked
baseline_women_q8___7	8. Before this pregnancy did you use any of the following methods to delay or prevent getting pregnant? (choice=Implants)	0	Unchecked
		1	Checked
baseline_women_q8___8	8. Before this pregnancy did you use any of the following methods to delay or prevent getting pregnant? (choice=IUD)	0	Unchecked
		1	Checked
baseline_women_q8___9	8. Before this pregnancy did you use any of the following methods to delay or prevent getting pregnant? (choice=Emergency contraception)	0	Unchecked
		1	Checked
baseline_women_q8___11	8. Before this pregnancy did you use any of the following methods to delay or prevent getting pregnant? (choice=Other)	0	Unchecked
		1	Checked
baseline_women_q8___12	8. Before this pregnancy did you use any of the following methods to delay or prevent getting pregnant? (choice=None)	0	Unchecked
		1	Checked
baseline_women_q9	9. Would you say that in the past using contraception is mainly your decision mainly your (husbands/partners) decision or did you both decide together	1	Mainly respondent
		2	Mainly husband/partner
		3	Joint decision
		4	Other
baseline_women_q10	10. If it was up to you after you have this baby would you want to delay getting pregnant again right away?	1	Yes
		2	No
		3	Not sure/undecided
baseline_women_q11	11. Do you think there are advantages to spacing pregnancies apart?	1	Yes
		2	No
		3	Not sure
baseline_women_q12___1	12. If yes what are some advantages? (choice=Mom will be healthier/ less likely to have problems)	0	Unchecked
		1	Checked
baseline_women_q12___2	12. If yes what are some advantages? (choice=Baby will be healthier/ less likely to have problems)	0	Unchecked
		1	Checked
baseline_women_q12___3	12. If yes what are some advantages? (choice=Easier to feed and/or take care of other children)	0	Unchecked
		1	Checked
baseline_women_q12___4	12. If yes what are some advantages? (choice=Saves money)	0	Unchecked
		1	Checked
baseline_women_q12___5	12. If yes what are some advantages? (choice=Other)	0	Unchecked
		1	Checked
pregnancy_spacing	13. How long should pregnancies be spaced apart for the best health of the mother and baby?	1	Knows the time
		2	Dont know
		3	No response
baseline_women_q13	Enter the time in months here
baseline_women_q14	14. When do you think it is best to first breastfeed your baby?	1	Immediately or within 1 hour of delivery
		2	After the first milk has gone (when true milk comes in)
		3	Other
baseline_desc_q15	15. At what age do you think it is best to start giving your baby fluids or food other than breastmilk?	1	Knows the age
		2	Dont know
		3	No response
baseline_women_q15_weeks	15.1. Weeks
baseline_women_q15_months	15.2. Months
baseline_women_q16	16. Have you ever heard of using the lactational amenorrhea method LAM as a way to delay pregnancy after you have a baby? This method includes breastfeeding your baby.	1	Yes
		2	No
		3	Not sure
baseline_women_q17___1	17. Can you describe how to use the lactational amenorrhea method (LAM)? What criteria or conditions need to be met for it to be an effective way to prevent or delay pregnancy? (choice=Menstrual bleeding has not returned)	0	Unchecked
		1	Checked
baseline_women_q17___2	17. Can you describe how to use the lactational amenorrhea method (LAM)? What criteria or conditions need to be met for it to be an effective way to prevent or delay pregnancy? (choice=Baby is only breastfed/breastfed exclusively (no other food or liquids	0	Unchecked
		1	Checked
baseline_women_q17___3	17. Can you describe how to use the lactational amenorrhea method (LAM)? What criteria or conditions need to be met for it to be an effective way to prevent or delay pregnancy? (choice=Baby is less than six months old)	0	Unchecked
		1	Checked
baseline_women_q17___4	17. Can you describe how to use the lactational amenorrhea method (LAM)? What criteria or conditions need to be met for it to be an effective way to prevent or delay pregnancy? (choice=Other)	0	Unchecked
		1	Checked
baseline_women_q18	18. After the birth of a child can a woman become pregnant before her menstrual period has returned?	1	Yes
		2	No
		3	Dont know
baseline_women_q19___1	19. In addition to the lactational amenorrhea method (LAM) what other forms of birth spacing or family planning can you use immediately after delivery? (choice=Standard days or rhythm method (cycle beads/calendar/billings method))	0	Unchecked
		1	Checked
baseline_women_q19___2	19. In addition to the lactational amenorrhea method (LAM) what other forms of birth spacing or family planning can you use immediately after delivery? (choice=Withdrawal)	0	Unchecked
		1	Checked
baseline_women_q19___3	19. In addition to the lactational amenorrhea method (LAM) what other forms of birth spacing or family planning can you use immediately after delivery? (choice=Condoms)	0	Unchecked
		1	Checked
baseline_women_q19___4	19. In addition to the lactational amenorrhea method (LAM) what other forms of birth spacing or family planning can you use immediately after delivery? (choice=Pill/oral contraceptives)	0	Unchecked
		1	Checked
baseline_women_q19___5	19. In addition to the lactational amenorrhea method (LAM) what other forms of birth spacing or family planning can you use immediately after delivery? (choice=Injectable)	0	Unchecked
		1	Checked
baseline_women_q19___6	19. In addition to the lactational amenorrhea method (LAM) what other forms of birth spacing or family planning can you use immediately after delivery? (choice=Implants)	0	Unchecked
		1	Checked
baseline_women_q19___7	19. In addition to the lactational amenorrhea method (LAM) what other forms of birth spacing or family planning can you use immediately after delivery? (choice=IUD)	0	Unchecked
		1	Checked
baseline_women_q19___8	19. In addition to the lactational amenorrhea method (LAM) what other forms of birth spacing or family planning can you use immediately after delivery? (choice=Emergency contraception)	0	Unchecked
		1	Checked
baseline_women_q19___10	19. In addition to the lactational amenorrhea method (LAM) what other forms of birth spacing or family planning can you use immediately after delivery? (choice=Other)	0	Unchecked
		1	Checked
baseline_women_q19___11	19. In addition to the lactational amenorrhea method (LAM) what other forms of birth spacing or family planning can you use immediately after delivery? (choice=None)	0	Unchecked
		1	Checked
baseline_women_q19___12	19. In addition to the lactational amenorrhea method (LAM) what other forms of birth spacing or family planning can you use immediately after delivery? (choice=Dont know)	0	Unchecked
		1	Checked
baseline_women_q20___1	20. What are danger/warning signs during pregnancy? Things that mean there might be a problem with you or the baby? (choice=Pain (not otherwise specified))	0	Unchecked
		1	Checked
baseline_women_q20___2	20. What are danger/warning signs during pregnancy? Things that mean there might be a problem with you or the baby? (choice=Headache)	0	Unchecked
		1	Checked
baseline_women_q20___3	20. What are danger/warning signs during pregnancy? Things that mean there might be a problem with you or the baby? (choice=Vision changes/blurred vision)	0	Unchecked
		1	Checked
baseline_women_q20___4	20. What are danger/warning signs during pregnancy? Things that mean there might be a problem with you or the baby? (choice=Nausea & vomiting)	0	Unchecked
		1	Checked
baseline_women_q20___5	20. What are danger/warning signs during pregnancy? Things that mean there might be a problem with you or the baby? (choice=Pain in abdomen)	0	Unchecked
		1	Checked
baseline_women_q20___6	20. What are danger/warning signs during pregnancy? Things that mean there might be a problem with you or the baby? (choice=Shortness of breath)	0	Unchecked
		1	Checked
baseline_women_q20___7	20. What are danger/warning signs during pregnancy? Things that mean there might be a problem with you or the baby? (choice=Fever)	0	Unchecked
		1	Checked
baseline_women_q20___8	20. What are danger/warning signs during pregnancy? Things that mean there might be a problem with you or the baby? (choice=Vaginal bleeding)	0	Unchecked
		1	Checked
baseline_women_q20___9	20. What are danger/warning signs during pregnancy? Things that mean there might be a problem with you or the baby? (choice=Leaking of fluids)	0	Unchecked
		1	Checked
baseline_women_q20___10	20. What are danger/warning signs during pregnancy? Things that mean there might be a problem with you or the baby? (choice=Change in colour or smell of vaginal discharge)	0	Unchecked
		1	Checked
baseline_women_q20___11	20. What are danger/warning signs during pregnancy? Things that mean there might be a problem with you or the baby? (choice=Painful urination)	0	Unchecked
		1	Checked
baseline_women_q20___12	20. What are danger/warning signs during pregnancy? Things that mean there might be a problem with you or the baby? (choice=Signs of Labor before its time for the baby to come)	0	Unchecked
		1	Checked
baseline_women_q20___13	20. What are danger/warning signs during pregnancy? Things that mean there might be a problem with you or the baby? (choice=Reduced or No fetal movement)	0	Unchecked
		1	Checked
baseline_women_q20___14	20. What are danger/warning signs during pregnancy? Things that mean there might be a problem with you or the baby? (choice=Other)	0	Unchecked
		1	Checked
baseline_women_q20___15	20. What are danger/warning signs during pregnancy? Things that mean there might be a problem with you or the baby? (choice=Dont know)	0	Unchecked
		1	Checked
baseline_women_q21___1	21. What are danger/warning signs for you the mother after the baby is born? These are things that mean there might be a problem and that you should see a health care worker. (choice=Heavy bleeding)	0	Unchecked
		1	Checked
baseline_women_q21___2	21. What are danger/warning signs for you the mother after the baby is born? These are things that mean there might be a problem and that you should see a health care worker. (choice=Severe abdominal (stomach) pain)	0	Unchecked
		1	Checked
baseline_women_q21___3	21. What are danger/warning signs for you the mother after the baby is born? These are things that mean there might be a problem and that you should see a health care worker. (choice=Severe pain and/or read and hot breasts)	0	Unchecked
		1	Checked
baseline_women_q21___4	21. What are danger/warning signs for you the mother after the baby is born? These are things that mean there might be a problem and that you should see a health care worker. (choice=Severe headache)	0	Unchecked
		1	Checked
baseline_women_q21___5	21. What are danger/warning signs for you the mother after the baby is born? These are things that mean there might be a problem and that you should see a health care worker. (choice=Visual disturbances)	0	Unchecked
		1	Checked
baseline_women_q21___6	21. What are danger/warning signs for you the mother after the baby is born? These are things that mean there might be a problem and that you should see a health care worker. (choice=Fever)	0	Unchecked
		1	Checked
baseline_women_q21___7	21. What are danger/warning signs for you the mother after the baby is born? These are things that mean there might be a problem and that you should see a health care worker. (choice=Unexplained pain in chest or legs)	0	Unchecked
		1	Checked
baseline_women_q21___8	21. What are danger/warning signs for you the mother after the baby is born? These are things that mean there might be a problem and that you should see a health care worker. (choice=Breathing difficulties)	0	Unchecked
		1	Checked
baseline_women_q21___9	21. What are danger/warning signs for you the mother after the baby is born? These are things that mean there might be a problem and that you should see a health care worker. (choice=Difficult or painful urination)	0	Unchecked
		1	Checked
baseline_women_q21___10	21. What are danger/warning signs for you the mother after the baby is born? These are things that mean there might be a problem and that you should see a health care worker. (choice=Other)	0	Unchecked
		1	Checked
baseline_women_q21___11	21. What are danger/warning signs for you the mother after the baby is born? These are things that mean there might be a problem and that you should see a health care worker. (choice=Dont know)	0	Unchecked
		1	Checked
baseline_women_q22___1	22. What are danger/warning signs for your newborn? These are signs that there may be a problem and you need to seek care from a health care worker. (choice=Too hot or too cold)	0	Unchecked
		1	Checked
baseline_women_q22___2	22. What are danger/warning signs for your newborn? These are signs that there may be a problem and you need to seek care from a health care worker. (choice=Convulsions)	0	Unchecked
		1	Checked
baseline_women_q22___3	22. What are danger/warning signs for your newborn? These are signs that there may be a problem and you need to seek care from a health care worker. (choice=Little or no movement)	0	Unchecked
		1	Checked
baseline_women_q22___4	22. What are danger/warning signs for your newborn? These are signs that there may be a problem and you need to seek care from a health care worker. (choice=Feeding poorly or not at all)	0	Unchecked
		1	Checked
baseline_women_q22___5	22. What are danger/warning signs for your newborn? These are signs that there may be a problem and you need to seek care from a health care worker. (choice=Fast breathing or chest indrawing)	0	Unchecked
		1	Checked
baseline_women_q22___6	22. What are danger/warning signs for your newborn? These are signs that there may be a problem and you need to seek care from a health care worker. (choice=Not passing urine and/or stool)	0	Unchecked
		1	Checked
baseline_women_q22___7	22. What are danger/warning signs for your newborn? These are signs that there may be a problem and you need to seek care from a health care worker. (choice=Umbilical cord stump is bleeding; has foul odor; or redness around it)	0	Unchecked
		1	Checked
baseline_women_q22___8	22. What are danger/warning signs for your newborn? These are signs that there may be a problem and you need to seek care from a health care worker. (choice=Very small baby born at home)	0	Unchecked
		1	Checked
baseline_women_q22___9	22. What are danger/warning signs for your newborn? These are signs that there may be a problem and you need to seek care from a health care worker. (choice=Yellow palms or soles of feet)	0	Unchecked
		1	Checked
baseline_women_q22___10	22. What are danger/warning signs for your newborn? These are signs that there may be a problem and you need to seek care from a health care worker. (choice=Other)	0	Unchecked
		1	Checked
baseline_women_q22___11	22. What are danger/warning signs for your newborn? These are signs that there may be a problem and you need to seek care from a health care worker. (choice=Dont know)	0	Unchecked
		1	Checked
baseline_women_q23___1	23. What are the most important things you can do to help keep your newborn healthy? (choice=Keep warm (keep head and body covered; skin to skin with mom))	0	Unchecked
		1	Checked
baseline_women_q23___2	23. What are the most important things you can do to help keep your newborn healthy? (choice=Feed only on breastmilk)	0	Unchecked
		1	Checked
baseline_women_q23___3	23. What are the most important things you can do to help keep your newborn healthy? (choice=Feed often/whenever baby wants)	0	Unchecked
		1	Checked
baseline_women_q23___4	23. What are the most important things you can do to help keep your newborn healthy? (choice=Do not put anything on cord stump)	0	Unchecked
		1	Checked
baseline_women_q23___5	23. What are the most important things you can do to help keep your newborn healthy? (choice=Keep cord stump clean)	0	Unchecked
		1	Checked
baseline_women_q23___6	23. What are the most important things you can do to help keep your newborn healthy? (choice=Wash hands)	0	Unchecked
		1	Checked
baseline_women_q23___7	23. What are the most important things you can do to help keep your newborn healthy? (choice=Have baby immunized)	0	Unchecked
		1	Checked
baseline_women_q23___8	23. What are the most important things you can do to help keep your newborn healthy? (choice=Wait atleast 24 hours before bathing baby)	0	Unchecked
		1	Checked
baseline_women_q23___9	23. What are the most important things you can do to help keep your newborn healthy? (choice=Other)	0	Unchecked
		1	Checked
baseline_women_q23___10	23. What are the most important things you can do to help keep your newborn healthy? (choice=Dont know)	0	Unchecked
		1	Checked
baseline_women_q24	24. Could you ask your husband/partner to use a condom if you wanted him to?	1	Yes
		2	No
		3	Not sure/Depends
baseline_women_q25	25. Who will usually make decisions about health care for yourself and your newborn?	1	You
		2	Your husband/partner
		3	You and your husband/partner jointly
		4	Someone else specify
baseline_women_q26a	a. If I dont understand something a provider is telling me I will tell them and ask them to explain a different way	1	Agree
		2	Disagree
		3	Neither agree nor disagree
baseline_women_q26b	b. There are things I can do to help prevent problems and keep myself and my baby healthy	1	Agree
		2	Disagree
		3	Neither agree nor disagree
baseline_women_q26c	c. I will talk with my husband/family about how to keep myself and our baby healthy	1	Agree
		2	Disagree
		3	Neither agree nor disagree
baseline_women_q26d	d. I know how to recognize a problem with my pregnancy	1	Agree
		2	Disagree
		3	Neither agree nor disagree
baseline_women_q26e	e. I know what actions I will take if I think there is a problem with my pregnancy	1	Agree
		2	Disagree
		3	Neither agree nor disagree
baseline_women_q26f	f. I know how to recognize a problem with my newborn	1	Agree
		2	Disagree
		3	Neither agree nor disagree
baseline_women_q26g	g. I know what actions I will take if I think there is a problem with my newborn	1	Agree
		2	Disagree
		3	Neither agree nor disagree
baseline_women_q26h	h. I am good at making decisions related to the health of myself and my family	1	Agree
		2	Disagree
		3	Neither agree nor disagree
baseline_women_q27a	a. I can talk to others about difficult subjects	1	Agree
		2	Disagree
baseline_women_q27b	b. I can let others know what I really think even if it is different from them	1	Agree
		2	Disagree
baseline_women_q27c	c.I like to make decisions for myself	1	Agree
		2	Disagree
baseline_women_q27d	d. I am able to make decisions for myself	1	Agree
		2	Disagree
baseline_survey_pregnant_women_complete	Complete?	0	Incomplete
		1	Unverified
		2	Complete
anc_survey_time	Date and Time of data collection - Data Quality Check
anc_survey_date	Date of data collection/ interview
attempts_done	How many attempts were made by phone to reach this participant
additional_strategies	Were additional strategies used to trace this participant?	0	No
		1	Yes
person_lost	Is this person lost to follow up?	0	No
		1	Yes
attend_meetings	1. Did woman attend any group meetings?	0	No
		1	Yes
hiv_status_known	2. HIV status known	0	No
		1	Yes
hiv_partner_tested	3. Partner HIV tested	0	No
		1	Yes
grp_meetings_attended___1	4. Which group meetings did the woman attend? (choice=M1)	0	Unchecked
		1	Checked
grp_meetings_attended___2	4. Which group meetings did the woman attend? (choice=M2)	0	Unchecked
		1	Checked
grp_meetings_attended___3	4. Which group meetings did the woman attend? (choice=M3)	0	Unchecked
		1	Checked
grp_meetings_attended___4	4. Which group meetings did the woman attend? (choice=M4)	0	Unchecked
		1	Checked
grp_meetings_attended___5	4. Which group meetings did the woman attend? (choice=M5)	0	Unchecked
		1	Checked
meeting_1_date	Meeting 1 Date
meeting_2_date	Meeting 2 Date
meeting_3_date	Meeting 3 Date
meeting_4_date	Meeting 4 Date
meeting_5_date	Meeting 5 Date
have_llin	5. Woman has LLIN?	0	No
		1	Yes
given_ifas	6. Given IFAS? (ever)	0	No
		1	Yes
meeting_1___1	7. For meeting 1 select all that apply (choice=Has IFA)	0	Unchecked
		1	Checked
meeting_1___2	7. For meeting 1 select all that apply (choice=Took IFA)	0	Unchecked
		1	Checked
meeting_1___3	7. For meeting 1 select all that apply (choice=Bed net)	0	Unchecked
		1	Checked
meeting_1___4	7. For meeting 1 select all that apply (choice=Gave SP)	0	Unchecked
		1	Checked
meeting_1___5	7. For meeting 1 select all that apply (choice=N/A missed meeting)	0	Unchecked
		1	Checked
meeting_2___1	8. For meeting 2 select all that apply (choice=Has IFA)	0	Unchecked
		1	Checked
meeting_2___2	8. For meeting 2 select all that apply (choice=Took IFA)	0	Unchecked
		1	Checked
meeting_2___3	8. For meeting 2 select all that apply (choice=Bed net)	0	Unchecked
		1	Checked
meeting_2___4	8. For meeting 2 select all that apply (choice=Gave SP)	0	Unchecked
		1	Checked
meeting_2___5	8. For meeting 2 select all that apply (choice=N/A missed meeting)	0	Unchecked
		1	Checked
meeting_3___1	9. For meeting 3 select all that apply (choice=Has IFA)	0	Unchecked
		1	Checked
meeting_3___2	9. For meeting 3 select all that apply (choice=Took IFA)	0	Unchecked
		1	Checked
meeting_3___3	9. For meeting 3 select all that apply (choice=Bed net)	0	Unchecked
		1	Checked
meeting_3___4	9. For meeting 3 select all that apply (choice=Gave SP)	0	Unchecked
		1	Checked
meeting_3___5	9. For meeting 3 select all that apply (choice=N/A missed meeting)	0	Unchecked
		1	Checked
meeting_4___1	10. For meeting 4 select all that apply (choice=Has IFA)	0	Unchecked
		1	Checked
meeting_4___2	10. For meeting 4 select all that apply (choice=Took IFA)	0	Unchecked
		1	Checked
meeting_4___3	10. For meeting 4 select all that apply (choice=Bed net)	0	Unchecked
		1	Checked
meeting_4___4	10. For meeting 4 select all that apply (choice=Gave SP)	0	Unchecked
		1	Checked
meeting_4___5	10. For meeting 4 select all that apply (choice=N/A missed meeting)	0	Unchecked
		1	Checked
meeting_5___1	11. For meeting 5 select all that apply (choice=Has IFA)	0	Unchecked
		1	Checked
meeting_5___2	11. For meeting 5 select all that apply (choice=Took IFA)	0	Unchecked
		1	Checked
meeting_5___3	11. For meeting 5 select all that apply (choice=Bed net)	0	Unchecked
		1	Checked
meeting_5___4	11. For meeting 5 select all that apply (choice=Gave SP)	0	Unchecked
		1	Checked
meeting_5___5	11. For meeting 5 select all that apply (choice=N/A missed meeting)	0	Unchecked
		1	Checked
meeting_1_sys	12. Meeting 1: Systolic
meeting_1_dias	12. Meeting 1: Diastolic
meeting_2_sys	13. Meeting 2: Systolic
meeting_2_dias	13. Meeting 2: Diastolic
meeting_3_sys	14. Meeting 3: Systolic
meeting_3_dias	14. Meeting 3: Diastolic
meeting_4_sys	15. Meeting 4: Systolic
meeting_4_dias	15. Meeting 4: Diastolic
meeting_5_sys	16. Meeting 5: Systolic
meeting_5_dias	16. Meeting 5: Diastolic
bp_counseling	18. BP counseling	0	No
		1	Yes
delivery_specified	19. Place of delivery specified?	0	No
		1	Yes
plan_transport	21. Plan: transport	0	No
		1	Yes
		3	N/A
plan_emergency_cash	22. Plan: emergency cash	0	No
		1	Yes
		3	N/A
plan_companion	23. Plan: companion	0	No
		1	Yes
		3	N/A
plan_decision_maker	24. Plan: decision maker	0	No
		1	Yes
		3	N/A
fp_desired_mtng4	25. FP desired? Meeting 4	0	No
		1	Yes
		3	N/A
fp_desired_mtng5	26. FP desired? Meeting 5	0	No
		1	Yes
		3	N/A
chose_method_g4	27. Chosen desired method? Meeting 4 (G4)	0	No
		1	Yes
g4_desired_method	27i. Specify method	1	Injectable
		2	Implants
		3	Withdrawal
		4	Condoms
		5	Pill/Oral contraceptives
		6	IUD
		7	Emergency contraception
		8	Sterilisation
		9	Standard days or rhythm method
		10	Other
		11	LAM
chose_method_g5	28. Chosen desired method? Meeting 5 (G5)	0	No
		1	Yes
g5_desired_method	28i. Specify method	1	Injectable
		2	Implants
		3	Withdrawal
		4	Condoms
		5	Pill/Oral contraceptives
		6	IUD
		7	Emergency contraception
		8	Sterilisation
		9	Standard days or rhythm method
		10	Other
		11	LAM
lam_chosen	29. If LAM select method transition method chosen?	0	No
		1	Yes
		3	N/A
transition_method	29i. Specify method	1	Injectable
		2	Implants
		3	Withdrawal
		4	Condoms
		5	Pill/Oral contraceptives
		6	IUD
		7	Emergency contraception
		8	Sterilisation
		9	Standard days or rhythm method
		10	Other
data_extraction_complete	Complete?	0	Incomplete
		1	Unverified
		2	Complete
birth_classification	1. Tell me what happened to your last pregnancy	1	Live birth
		2	Still birth
		3	Miscarriage
live_birth_date	Live birth date baby born
still_birth_date	Still birth date baby born
miscarriage_ga	Miscarriage Week of pregnancy
miscarriage_date	Miscarriage Date
know_due_date	2. Did you know your due date the time around when the baby was suppose to be born?	1	Yes
		2	No
		3	Not sure
know_due_date_how	3. If yes how?	1	Provider told me
		2	Other
baby_premature	4. Do you think your baby was premature that is born too soon?	1	Yes
		2	No
		3	Not sure
baby_alive	5. Is your baby alive today?	1	Yes
		2	No
consent_to_continue	5a. Im sorry for your loss. Is it OK if I ask you questions about the antenatal care you received? If it will be too upsetting we can stop now.	1	Yes
		2	No
danger_signs___1	6. What are danger/warning signs during pregnancy? Things that mean there might be a problem with you or the baby? (choice=Pain (not otherwise specified))	0	Unchecked
		1	Checked
danger_signs___2	6. What are danger/warning signs during pregnancy? Things that mean there might be a problem with you or the baby? (choice=Headache)	0	Unchecked
		1	Checked
danger_signs___3	6. What are danger/warning signs during pregnancy? Things that mean there might be a problem with you or the baby? (choice=Vision changes/blurred vision)	0	Unchecked
		1	Checked
danger_signs___4	6. What are danger/warning signs during pregnancy? Things that mean there might be a problem with you or the baby? (choice=Nausea and vomiting)	0	Unchecked
		1	Checked
danger_signs___5	6. What are danger/warning signs during pregnancy? Things that mean there might be a problem with you or the baby? (choice=Pain in abdomen)	0	Unchecked
		1	Checked
danger_signs___6	6. What are danger/warning signs during pregnancy? Things that mean there might be a problem with you or the baby? (choice=Shortness of breath)	0	Unchecked
		1	Checked
danger_signs___7	6. What are danger/warning signs during pregnancy? Things that mean there might be a problem with you or the baby? (choice=Fever)	0	Unchecked
		1	Checked
danger_signs___8	6. What are danger/warning signs during pregnancy? Things that mean there might be a problem with you or the baby? (choice=Vaginal bleeding)	0	Unchecked
		1	Checked
danger_signs___9	6. What are danger/warning signs during pregnancy? Things that mean there might be a problem with you or the baby? (choice=Leaking of fluids)	0	Unchecked
		1	Checked
danger_signs___10	6. What are danger/warning signs during pregnancy? Things that mean there might be a problem with you or the baby? (choice=Change in color or smell of vaginal discharge)	0	Unchecked
		1	Checked
danger_signs___11	6. What are danger/warning signs during pregnancy? Things that mean there might be a problem with you or the baby? (choice=Painful urination)	0	Unchecked
		1	Checked
danger_signs___12	6. What are danger/warning signs during pregnancy? Things that mean there might be a problem with you or the baby? (choice=Signs of labour before its time for the baby to come (preterm labour): bloody show cramping/painful tightening of belly/contractions	0	Unchecked
		1	Checked
danger_signs___13	6. What are danger/warning signs during pregnancy? Things that mean there might be a problem with you or the baby? (choice=Reduced or no fetal movement)	0	Unchecked
		1	Checked
danger_signs___14	6. What are danger/warning signs during pregnancy? Things that mean there might be a problem with you or the baby? (choice=Other)	0	Unchecked
		1	Checked
danger_signs___15	6. What are danger/warning signs during pregnancy? Things that mean there might be a problem with you or the baby? (choice=Dont know)	0	Unchecked
		1	Checked
asked_if_had_pain	a. Pain	1	Yes
		2	No
		3	Not sure
asked_if_had_fever	b. Fever	1	Yes
		2	No
		3	Not sure
asked_if_had_bleeding	c. Bleeding	1	Yes
		2	No
		3	Not sure
asked_if_had_leakage	d. leakage of fluids	1	Yes
		2	No
		3	Not sure
no_fetal_movement	e. Reduced or no fetal movement	1	Yes
		2	No
		3	Not sure
have_high_blood_pressure	8. Have you ever been told you had high blood pressure?	1	Yes
		2	No
		3	Not sure
have_high_bp_before_preg	9. Did you have high blood pressure before pregnancy?	1	Yes
		2	No
		3	Not sure
attend_anc_dueto_hbp	10. Did you attend additional ANC visits because of it?	1	Yes
		2	No
		3	Not sure
take_hbp_medication	11. Did you take any medication for it?	1	Yes
		2	No
		3	Not sure
receive_care_dueto_hbp	12. Did you receive any other special care related to your blood pressure?	1	Yes
		2	No
have_severe_headache	13. During your pregnancy did you ever have a severe headache or vision changes?	1	Yes
		2	No
sought_help_headache	14. Did you seek help?	1	Yes
		2	No
where_sought_help_headache	15. Where/from who did you first seek help?	1	Dispensary/health center/clinic [N-primary]
		2	Hospital [N-secondary/tertiary]
		3	Chemist/Pharmacy
		4	Community health worker/volunteer
		5	Non CHW TBA [if TBA & CHW categorize as CHW]
		6	Friend/family/neighbor
		7	Traditional healer/faith healer
		8	Other
had_vaginal_bleeding	16. During your pregnancy did you ever have any vaginal bleeding or leakage of fluids?	1	Yes
		2	No
bleeding_sought_help	17. Did you seek help?	1	Yes
		2	No
where_sought_help_bleeding	18. Where/from who did you first seek help?	1	Dispensary/health center/clinic [N-primary]
		2	Hospital [N-secondary/tertiary]
		3	Chemist/Pharmacy
		4	Community health worker/volunteer
		5	Non CHW TBA [if TBA & CHW categorize as CHW]
		6	Friend/family/neighbor
		7	Traditional healer/faith healer
		8	Other
had_painful_contractions	19. During your pregnancy did you ever have painful contractions or cramping when it was too early for the baby to come?	1	Yes
		2	No
sought_help_contractions	20. Did you seek help?	1	Yes
		2	No
where_got_help_contractions	21. Where/from who did you first seek help?	1	Dispensary/health center/clinic [N-primary]
		2	Hospital [N-secondary/tertiary]
		3	Chemist/Pharmacy
		4	Community health worker/volunteer
		5	Non CHW TBA [if TBA & CHW categorize as CHW]
		6	Friend/family/neighbor
		7	Traditional healer/faith healer
		8	Other
had_fever	22. During your pregnancy or since you had your baby have you had a fever?	1	Yes
		2	No
sought_help_fever	23. Did you seek help?	1	Yes
		2	No
where_sought_help_fever	24. Where/from who did you first seek help?	1	Dispensary/health center/clinic [N-primary]
		2	Hospital [N-secondary/tertiary]
		3	Chemist/Pharmacy
		4	Community health worker/volunteer
		5	Non CHW TBA [if TBA & CHW categorize as CHW]
		6	Friend/family/neighbor
		7	Traditional healer/faith healer
		8	Other
where_sought_help_problems	27. Where/from who did you first seek help?	1	Dispensary/health center/clinic [N-primary]
		2	Hospital [N-secondary/tertiary]
		3	Chemist/Pharmacy
		4	Community health worker/volunteer
		5	Non CHW TBA [if TBA & CHW categorize as CHW]
		6	Friend/family/neighbor
		7	Traditional healer/faith healer
		8	Other
talk_options_for_fp	a. Options for family planning/child spacing	1	Yes
		2	No
		3	Not sure
talk_breastfeeding	b. How to use breastfeeding to prevent another pregnancy right away	1	Yes
		2	No
		3	Not sure
talk_begin_breastfeeding	c. When to begin breastfeeding	1	Yes
		2	No
		3	Not sure
talk_danger_signs	e. Danger signs or warning signs to watch for during pregnancy?	1	Yes
		2	No
		3	Not sure
talk_return_to_clinic	f. Returning to the clinic if you noticed any danger signs warning signs or had other problems?	1	Yes
		2	No
		3	Not sure
talk_eating_extra_food	g. Eating extra food while pregnant and breastfeeding	1	Yes
		2	No
		3	Not sure
talk_newborn_danger_signs	h. Danger signs or problems to watch for in your newborn?	1	Yes
		2	No
		3	Not sure
talk_prevent_sti	i. How to prevent transmission of sexually transmitted infections	1	Yes
		2	No
		3	Not sure
talk_sleeping_under_net	j. The importance of sleeping under a bed net	1	Yes
		2	No
		3	Not sure
talk_taking_iron_folic	k. The importance of taking iron and folic acid tablets (blood tonic)	1	Yes
		2	No
		3	Not sure
talk_birth_plan	l. The importance of making a birth plan and what to plan for	1	Yes
		2	No
		3	Not sure
birth_spacing	29. Do you think there are advantages to spacing pregnancies apart?	1	Yes
		2	No
		3	Not sure
advtg_birth_spacing___1	30. What are some advantages? (choice=Mom will be healthier/ less likely to have problems)	0	Unchecked
		1	Checked
advtg_birth_spacing___2	30. What are some advantages? (choice=Baby will be healthier/ less likely to have problems)	0	Unchecked
		1	Checked
advtg_birth_spacing___3	30. What are some advantages? (choice=Easier to feed and/or take care of other children)	0	Unchecked
		1	Checked
advtg_birth_spacing___4	30. What are some advantages? (choice=Saves money)	0	Unchecked
		1	Checked
advtg_birth_spacing___5	30. What are some advantages? (choice=Other)	0	Unchecked
		1	Checked
birth_spacing_time	31. How long should pregnancies be spaced apart for the best health of the mother and baby
when_to_first_breastfeed	32. When do you think it is best to first breastfeed your baby?	1	Immediately or within 1 hour of delivery
		2	After the first milk has gone - when the true milk comes in
		3	Other
fluids_age_weeks	Weeks
fluids_age_months	Months
ever_heard_of_lam	34. Have you ever heard of using the lactational amenorrhea method LAM as a way to delay pregnancy after you have a baby? This method includes breastfeeding your baby.	1	Yes
		2	No
		3	Not sure
how_to_use_lam___1	35. Can you describe how to use lactational amenorrhea method (LAM)? What criteria or conditions need to be met for it to be an effective way to prevent or delay pregnancy? (choice=Menstrual bleeding has not returned)	0	Unchecked
		1	Checked
how_to_use_lam___2	35. Can you describe how to use lactational amenorrhea method (LAM)? What criteria or conditions need to be met for it to be an effective way to prevent or delay pregnancy? (choice=Baby is only breastfed/breastfed exclusively (no other food or liquids give	0	Unchecked
		1	Checked
how_to_use_lam___3	35. Can you describe how to use lactational amenorrhea method (LAM)? What criteria or conditions need to be met for it to be an effective way to prevent or delay pregnancy? (choice=Baby is less than six months old)	0	Unchecked
		1	Checked
how_to_use_lam___4	35. Can you describe how to use lactational amenorrhea method (LAM)? What criteria or conditions need to be met for it to be an effective way to prevent or delay pregnancy? (choice=Other)	0	Unchecked
		1	Checked
pregnant_before_menstrual	36. After the birth of a child can a woman become pregnant before her menstrual period has returned?	1	Yes
		2	No
		3	Dont know
fp_methods_know_of___1	37. In addition to the lactational amenorrhea method (LAM) what other forms of birth spacing or family planning can you use immediately after delivery? (choice=Standard days or rhythm method (cycle beads/calendar/billings method))	0	Unchecked
		1	Checked
fp_methods_know_of___2	37. In addition to the lactational amenorrhea method (LAM) what other forms of birth spacing or family planning can you use immediately after delivery? (choice=Withdrawal)	0	Unchecked
		1	Checked
fp_methods_know_of___3	37. In addition to the lactational amenorrhea method (LAM) what other forms of birth spacing or family planning can you use immediately after delivery? (choice=Condoms)	0	Unchecked
		1	Checked
fp_methods_know_of___4	37. In addition to the lactational amenorrhea method (LAM) what other forms of birth spacing or family planning can you use immediately after delivery? (choice=Pill/oral contraceptives)	0	Unchecked
		1	Checked
fp_methods_know_of___5	37. In addition to the lactational amenorrhea method (LAM) what other forms of birth spacing or family planning can you use immediately after delivery? (choice=Injectable)	0	Unchecked
		1	Checked
fp_methods_know_of___6	37. In addition to the lactational amenorrhea method (LAM) what other forms of birth spacing or family planning can you use immediately after delivery? (choice=Implants)	0	Unchecked
		1	Checked
fp_methods_know_of___7	37. In addition to the lactational amenorrhea method (LAM) what other forms of birth spacing or family planning can you use immediately after delivery? (choice=IUD)	0	Unchecked
		1	Checked
fp_methods_know_of___8	37. In addition to the lactational amenorrhea method (LAM) what other forms of birth spacing or family planning can you use immediately after delivery? (choice=Emergency contraception)	0	Unchecked
		1	Checked
fp_methods_know_of___10	37. In addition to the lactational amenorrhea method (LAM) what other forms of birth spacing or family planning can you use immediately after delivery? (choice=Other)	0	Unchecked
		1	Checked
fp_methods_know_of___11	37. In addition to the lactational amenorrhea method (LAM) what other forms of birth spacing or family planning can you use immediately after delivery? (choice=None)	0	Unchecked
		1	Checked
fp_methods_know_of___12	37. In addition to the lactational amenorrhea method (LAM) what other forms of birth spacing or family planning can you use immediately after delivery? (choice=Dont Know)	0	Unchecked
		1	Checked
danger_signs_for_newborn___1	39. What are danger/warning signs for your newborn? These are things that mean there might be a problem and that you should see a health care worker. (choice=Too hot or too cold)	0	Unchecked
		1	Checked
danger_signs_for_newborn___2	39. What are danger/warning signs for your newborn? These are things that mean there might be a problem and that you should see a health care worker. (choice=Convulsions)	0	Unchecked
		1	Checked
danger_signs_for_newborn___3	39. What are danger/warning signs for your newborn? These are things that mean there might be a problem and that you should see a health care worker. (choice=Little or no movement)	0	Unchecked
		1	Checked
danger_signs_for_newborn___4	39. What are danger/warning signs for your newborn? These are things that mean there might be a problem and that you should see a health care worker. (choice=Feeding poorly or not at all)	0	Unchecked
		1	Checked
danger_signs_for_newborn___5	39. What are danger/warning signs for your newborn? These are things that mean there might be a problem and that you should see a health care worker. (choice=Fast breathing or chest indrawing)	0	Unchecked
		1	Checked
danger_signs_for_newborn___6	39. What are danger/warning signs for your newborn? These are things that mean there might be a problem and that you should see a health care worker. (choice=Not passing urine and/or stool)	0	Unchecked
		1	Checked
danger_signs_for_newborn___7	39. What are danger/warning signs for your newborn? These are things that mean there might be a problem and that you should see a health care worker. (choice=Umbilical cord stump is bleeding; has foul odor; or redness around it)	0	Unchecked
		1	Checked
danger_signs_for_newborn___8	39. What are danger/warning signs for your newborn? These are things that mean there might be a problem and that you should see a health care worker. (choice=Very small baby born at home)	0	Unchecked
		1	Checked
danger_signs_for_newborn___9	39. What are danger/warning signs for your newborn? These are things that mean there might be a problem and that you should see a health care worker. (choice=Yellow palms or soles of feet)	0	Unchecked
		1	Checked
danger_signs_for_newborn___10	39. What are danger/warning signs for your newborn? These are things that mean there might be a problem and that you should see a health care worker. (choice=Other)	0	Unchecked
		1	Checked
danger_signs_for_newborn___11	39. What are danger/warning signs for your newborn? These are things that mean there might be a problem and that you should see a health care worker. (choice=Dont know)	0	Unchecked
		1	Checked
keep_newborn_healthy___1	40. What are the most important things you can do to help keep your newborn healthy? (choice=Keep warm (keep head and body covered; skin to skin with mom))	0	Unchecked
		1	Checked
keep_newborn_healthy___2	40. What are the most important things you can do to help keep your newborn healthy? (choice=Feed only on breastmilk)	0	Unchecked
		1	Checked
keep_newborn_healthy___3	40. What are the most important things you can do to help keep your newborn healthy? (choice=Feed often/whenever baby wants)	0	Unchecked
		1	Checked
keep_newborn_healthy___4	40. What are the most important things you can do to help keep your newborn healthy? (choice=Do not put anything on cord stump)	0	Unchecked
		1	Checked
keep_newborn_healthy___5	40. What are the most important things you can do to help keep your newborn healthy? (choice=Keep cord stump clean)	0	Unchecked
		1	Checked
keep_newborn_healthy___6	40. What are the most important things you can do to help keep your newborn healthy? (choice=Wash hands)	0	Unchecked
		1	Checked
keep_newborn_healthy___7	40. What are the most important things you can do to help keep your newborn healthy? (choice=Have baby immunized)	0	Unchecked
		1	Checked
keep_newborn_healthy___8	40. What are the most important things you can do to help keep your newborn healthy? (choice=Wait atleast 24 hours before bathing baby)	0	Unchecked
		1	Checked
keep_newborn_healthy___9	40. What are the most important things you can do to help keep your newborn healthy? (choice=Other)	0	Unchecked
		1	Checked
keep_newborn_healthy___10	40. What are the most important things you can do to help keep your newborn healthy? (choice=Dont know)	0	Unchecked
		1	Checked
given_mosquito_net	41. Were you given a mosquito net during ANC care for this pregnancy?	1	Yes
		2	No
		3	Not sure
slept_under_net	42. Did you sleep under a bed net last night?	1	Yes
		2	No
		3	Not sure
baby_slept_under_net	43. Did your baby sleep under a bed net last night?	1	Yes
		2	No
		3	Not sure
did_hiv_test	44. Did you have an HIV test and receive the results during antenatal care?	1	Yes
		2	No
		3	Not sure
know_hiv_status	45. Did you know your HIV status before antenatal care?	1	Yes
		2	No
		3	Not sure
given_iron_folic	46. Were you given iron and folic acid tablets (blood tonic) during ANC care?	1	Yes
		2	No
		3	Not sure
run_outof_iron_folic	47. Did you run out of tablets at any time during your pregnancy	1	Yes
		2	No
		3	Not sure
given_more_iron_folic	48. Were you given additional iron and folic acid tablets (blood tonic) prior to delivery?	1	Yes
		2	No
		3	Not sure
take_iron_folic	49. Did you take an iron and folic acid tablet (blood tonic) yesterday?	1	Yes
		2	No
		3	Not sure
how_long_before_breastfed	50. How long after birth did you first put your baby to the breast?	1	Not applicable did not breastfeed
		2	Less than one hour
		3	Less than 24 hours
		4	>24 hours
less_than_24hrs_time	Specify hours for less than 24 hours choice
more_than_24hrs_time	Specify number of days for > than 24 hours choice
greeted_warmly	a. I was greeted warmly	1	Agree
		2	Disagree
		3	Neither Agree or Disagree
able_to_ask_questions	b. I was able to ask questions and they were answered in a way I understood	1	Agree
		2	Disagree
		3	Neither Agree or Disagree
learn_important_info	c. I learned important information about how to keep myself and my baby healthy	1	Agree
		2	Disagree
		3	Neither Agree or Disagree
left_confused	d. I left antenatal care visits with questions or confused about some things	1	Agree
		2	Disagree
		3	Neither Agree or Disagree
not_shown_respect	e. The provider did not show me respect or act in respectful ways	1	Agree
		2	Disagree
		3	Neither Agree or Disagree
want_similar_care	f. During my next pregnancy I would be happy to receive care similar to what I received during this past pregnancy	1	Agree
		2	Disagree
		3	Neither Agree or Disagree
recommend_the_place	g. I would recommend to a friend to go to the same place for antenatal care	1	Agree
		2	Disagree
		3	Neither Agree or Disagree
felt_respected	h. I felt respected	1	Agree
		2	Disagree
		3	Neither Agree or Disagree
enough_time_provider	i. I had enough time with my provider	1	Agree
		2	Disagree
		3	Neither Agree or Disagree
satisfied_with_care	j. I am very satisfied with the antenatal care I received	1	Agree
		2	Disagree
		3	Neither Agree or Disagree
group_or_individual	52. Imagine you were to get pregnant again. If you could choose would you prefer individual one on one antenatal visits or would you prefer group visits where you receive your care with other women who are at a similar time in their pregnancy?	1	Individual care
		2	Group care
was_comfortable	a. I was comfortable receiving antenatal care in a group	1	Agree
		2	Disagree
		3	Neither Agree or Disagree
worried_about_privacy	b. I was worried about privacy during group visits	1	Agree
		2	Disagree
		3	Neither Agree or Disagree
part_of_group	c. I felt like I was part of the group	1	Agree
		2	Disagree
		3	Neither Agree or Disagree
shared_thought_talking	d. I was comfortable talking and sharing thoughts with the group	1	Agree
		2	Disagree
		3	Neither Agree or Disagree
difficult_to_ask_qstns	e. Being in a group made it difficult to ask some questions I had	1	Agree
		2	Disagree
		3	Neither Agree or Disagree
women_listened_to_me	f. Women in the group listened to me	1	Agree
		2	Disagree
		3	Neither Agree or Disagree
spent_good_time_talking	g. The group leader talked at us or instructed us most of the time	1	Agree
		2	Disagree
		3	Neither Agree or Disagree
talked_too_much	h. The group leader talked too much	1	Agree
		2	Disagree
		3	Neither Agree or Disagree
all_women_talked	i. All women in the group had the chance to talk most visits	1	Agree
		2	Disagree
		3	Neither Agree or Disagree
group_leader_answd_qstns	k. Mostly the group leader not other members of the group answered our questions.	1	Agree
		2	Disagree
		3	Neither Agree or Disagree
changed_my_thinking	m. The group changed the way I think about some things	1	Agree
		2	Disagree
		3	Neither Agree or Disagree
who_makes_health_decision	54. Who will usually make decisions about health care for yourself and your newborn?	1	You
		2	Your husband/partner
		3	You and your husband/partner jointly
		4	Someone else
ask_to_use_condom	55. Could you ask your husband/partner to use a condom if you wanted him to?	1	Yes
		2	No
		3	Not sure/Depends
use_contraception_decision	56. Would you say that using (or not using) contraception is mainly your decision mainly your husbands/partners decision or did you both decide together?	1	Your decision
		2	Your husband/partners decision
		3	Joint decision
		4	Other
anc_survey_q57a	a. If I dont understand something a provider is telling me I will tell them and ask them to explain a different way	1	Agree
		2	Disagree
		3	Neither Agree or Disagree
anc_survey_q57b	b. There are things I can do to help prevent problems and keep myself and my baby healthy	1	Agree
		2	Disagree
		3	Neither Agree or Disagree
anc_survey_q57c	c. I will talk with my husband/family about how to keep myself and our baby healthy	1	Agree
		2	Disagree
		3	Neither Agree or Disagree
anc_survey_q57d	d. I know how to recognize a problem with my pregnancy	1	Agree
		2	Disagree
		3	Neither Agree or Disagree
anc_survey_q57e	e. I know what actions I will take if I think there is a problem with my pregnancy	1	Agree
		2	Disagree
		3	Neither Agree or Disagree
anc_survey_q57e_preg	If yes I will be able to take those actions if there is a problem	1	Agree
		2	Disagree
		3	Neither Agree or Disagree
anc_survey_q57f	f. I know how to recognize a problem with my newborn	1	Agree
		2	Disagree
		3	Neither Agree or Disagree
anc_survey_q57g	g. I know what actions I will take if I think there is a problem with my newborn	1	Agree
		2	Disagree
		3	Neither Agree or Disagree
anc_survey_q57h	h. I am good at making decisions related to the health of myself and my family	1	Agree
		2	Disagree
		3	Neither Agree or Disagree
anc_survey_q58a	a. I am comfortable talking about difficult subjects	1	Agree
		2	Disagree
anc_survey_q58b	b. I am comfortable letting others know what I really think even if it is different from them	1	Agree
		2	Disagree
anc_survey_q58c	c. I like to make decisions for myself	1	Agree
		2	Disagree
anc_survey_q58d	d. I am able to make decisions for myself	1	Agree
		2	Disagree
identified_facility	a. Identify a facility where you planned to give birth?	1	Yes
		2	No
planned_how_to_go	b.Plan how you were going to get there?	1	Yes
		2	No
planned_who_to_go_with	c. Plan who was going to go with you/help you?	1	Yes
		2	No
saved_emergency_cash	d. Save money in case of an emergency?	1	Yes
		2	No
agree_on_decision_maker	e. Decide who could make decisions in the case of emergency?	1	Yes
		2	No
alternative_to_decision_maker	e_i. Decide who else could make decisions if they werent around?	1	Yes
		2	No
prepared_birth_kit	f. Prepare a birth kit	1	Yes
		2	No
where_baby_was_born	60. Where was your baby born?	1	At home
		2	At a health Facility
		3	In transit
		4	Other
anc_influence_delivery	61. Did antenatal care influence your place of delivery?	1	Yes
		2	No
		3	Not sure
went_to_pnc	62. Have you already gone to a clinic/hospital for postnatal care (a check up for you and the baby?)	1	Yes
		2	No
went_to_pnc_days	63. If yes how many days after you delivered did you go?
went_to_pnc_2times	64. Did you go for postnatal care a second time?	1	Yes
		2	No
went_to_pnc_2times_days	65. If yes how many days after you delivered did you go?
anc_survey_q66a	a. During ANC care I was told about different methods I could use to space or prevent my next pregnancy	1	Agree
		2	Disagree
		3	Neither Agree or Disagree
anc_survey_q66b	b. During ANC care I received all the information I needed to make a decision about if and how to space my next pregnancy	1	Agree
		2	Disagree
		3	Neither Agree or Disagree
anc_survey_q66c	c. During ANC care I was given the opportunity to ask questions about different ways to space pregnancies	1	Agree
		2	Disagree
		3	Neither Agree or Disagree
anc_survey_q66d	d. All of my questions were answered in a way I understood	1	Agree
		2	Disagree
		3	Neither Agree or Disagree
anc_survey_q66f	e. I can have some control over if and when I get pregnant again	1	Agree
		2	Disagree
		3	Neither Agree or Disagree
want_to_delay_pregnancy	68. If it was up to you would you want to delay getting pregnant again right away?	1	Yes
		2	No
		3	Undecided
selected_fp_after_preg	69. During antenatal care did you select a form of family planning to use after your baby was born?	1	Yes
		2	No
currently_using_it	71. Are you currently using it?	1	Yes
		2	No
why_didnot_select_fp	74. Why didnt you select a method of birth spacing during antenatal care?	1	I dont want to space my next pregnancy/want to get pregnant again right away
		2	I didnt know what the options were/wasnt counseled/my provider didnt talk to me about it
		3	I couldnt decide
		4	Other
anc_survey_recently_delivered_women_complete	Complete?	0	Incomplete
		1	Unverified
		2	Complete
how_many_anc_visits	2. How many ANC visits did you go to in total at any facility?
went_with_book	3. Did you take the same mother and child health booklet (Kenya)/ ANC card (Nigeria) to all your ANC visits?	0	No
		1	Yes
		3	Unsure
book_card_available	4. Is your mother and child health booklet (Kenya) / ANC card (Nigeria) available?	0	No
		1	Yes
permission	5. May I please see your mother and child health booklet (Kenya) / ANC card (Nigeria) to extract some information for the study? I am looking to see what services were provided and will not record the results on any tests.	0	Permission denied
		1	Permission granted
attend_non_ganc	6. After ANC 1 did you attend any individual ANC visits any that were not part of the group?	0	No
		1	Yes
visit_1_date	Date of ANC visit
visit_1_sys	Systolic
visit_1_dias	Diastolic
visit_1_ifa	Given IFA	0	No
		1	Yes
		3	N/A
visit_1_iptp	Given IpTP	0	No
		1	Yes
		3	N/A
visit_2_date	Date of ANC visit
visit_2_sys	Systolic
visit_2_dias	Diastolic
visit_2_ifa	Given IFA	0	No
		1	Yes
		3	N/A
visit_2_iptp	Given IpTP	0	No
		1	Yes
		3	N/A
visit_3_date	Date of ANC visit
visit_3_sys	Systolic
visit_3_dias	Diastolic
visit_3_ifa	Given IFA	0	No
		1	Yes
		3	N/A
visit_3_iptp	Given IpTP	0	No
		1	Yes
		3	N/A
visit_4_date	Date of ANC visit
visit_4_sys	Systolic
visit_4_dias	Diastolic
visit_4_ifa	Given IFA	0	No
		1	Yes
		3	N/A
visit_4_iptp	Given IpTP	0	No
		1	Yes
		3	N/A
visit_5_date	Date of ANC visit
visit_5_sys	Systolic
visit_5_dias	Diastolic
visit_5_ifa	Given IFA	0	No
		1	Yes
		3	N/A
visit_5_iptp	Given IpTP	0	No
		1	Yes
		3	N/A
visit_6_date	Date of ANC visit
visit_6_sys	Systolic
visit_6_dias	Diastolic
visit_6_ifa	Given IFA	0	No
		1	Yes
		3	N/A
visit_6_iptp	Given IpTP	0	No
		1	Yes
		3	N/A
visit_7_date	Date of ANC visit
visit_7_sys	Systolic
visit_7_dias	Diastolic
visit_7_ifa	Given IFA	0	No
		1	Yes
		3	N/A
visit_7_iptp	Given IpTP	0	No
		1	Yes
		3	N/A
visit_8_date	Date of ANC visit
visit_8_sys	Systolic
visit_8_dias	Diastolic
visit_8_ifa	Given IFA	0	No
		1	Yes
		3	N/A
visit_8_iptp	Given IpTP	0	No
		1	Yes
		3	N/A
total_visits	Total number of ANC visits
given_llin_anc	Was client given LLIN during ANC care	0	No
		1	Yes
		3	N/A
hiv_status_anc	HIV status known?	0	No
		1	Yes
		3	N/A
hiv_partner_anc	HIV partner testing completed and status known?	0	No
		1	Yes
		3	N/A
syphillis_anc	Syphilis testing completed (VDRL/RPR)	0	No
		1	Yes
		3	N/A
conditions_detected___1	Were any of the following conditions detected during examination? [in mother child booklet look at clinical notes on pg. 6 & 10] (choice=Hypertension)	0	Unchecked
		1	Checked
conditions_detected___2	Were any of the following conditions detected during examination? [in mother child booklet look at clinical notes on pg. 6 & 10] (choice=Diabetes)	0	Unchecked
		1	Checked
conditions_detected___3	Were any of the following conditions detected during examination? [in mother child booklet look at clinical notes on pg. 6 & 10] (choice=Malaria)	0	Unchecked
		1	Checked
conditions_detected___4	Were any of the following conditions detected during examination? [in mother child booklet look at clinical notes on pg. 6 & 10] (choice=STIs/RTIs)	0	Unchecked
		1	Checked
conditions_detected___5	Were any of the following conditions detected during examination? [in mother child booklet look at clinical notes on pg. 6 & 10] (choice=Other)	0	Unchecked
		1	Checked
conditions_detected___6	Were any of the following conditions detected during examination? [in mother child booklet look at clinical notes on pg. 6 & 10] (choice=None)	0	Unchecked
		1	Checked
conditions_treated___1	Were any of the following conditions treated during the visit? [in mother child booklet look at clinical notes on pg. 6 & 10] (choice=Hypertension)	0	Unchecked
		1	Checked
conditions_treated___2	Were any of the following conditions treated during the visit? [in mother child booklet look at clinical notes on pg. 6 & 10] (choice=Diabetes)	0	Unchecked
		1	Checked
conditions_treated___3	Were any of the following conditions treated during the visit? [in mother child booklet look at clinical notes on pg. 6 & 10] (choice=Malaria)	0	Unchecked
		1	Checked
conditions_treated___4	Were any of the following conditions treated during the visit? [in mother child booklet look at clinical notes on pg. 6 & 10] (choice=STIs/RTIs)	0	Unchecked
		1	Checked
conditions_treated___5	Were any of the following conditions treated during the visit? [in mother child booklet look at clinical notes on pg. 6 & 10] (choice=Other)	0	Unchecked
		1	Checked
conditions_treated___6	Were any of the following conditions treated during the visit? [in mother child booklet look at clinical notes on pg. 6 & 10] (choice=None)	0	Unchecked
		1	Checked
data_source___1	Please select all data sources consulted for this record (choice=ANC group register)	0	Unchecked
		1	Checked
data_source___2	Please select all data sources consulted for this record (choice=Kenya mother child book)	0	Unchecked
		1	Checked
data_source___3	Please select all data sources consulted for this record (choice=Nigerian ANC card)	0	Unchecked
		1	Checked
data_source___4	Please select all data sources consulted for this record (choice=ANC registry)	0	Unchecked
		1	Checked
section_2_and_3_data_complete	Complete?	0	Incomplete
		1	Unverified
		2	Complete
pnc_attendance___1	PNC Attendance (choice=1)	0	Unchecked
		1	Checked
pnc_attendance___2	PNC Attendance (choice=2)	0	Unchecked
		1	Checked
pnc_attendance___3	PNC Attendance (choice=3)	0	Unchecked
		1	Checked
pnc_attendance___4	PNC Attendance (choice=4)	0	Unchecked
		1	Checked
pnc_attend_total	Total PNC
pnc_slept_bed___1	Baby slept uder bed net last night (choice=1)	0	Unchecked
		1	Checked
pnc_slept_bed___2	Baby slept uder bed net last night (choice=2)	0	Unchecked
		1	Checked
pnc_slept_bed___3	Baby slept uder bed net last night (choice=3)	0	Unchecked
		1	Checked
pnc_slept_bed___4	Baby slept uder bed net last night (choice=4)	0	Unchecked
		1	Checked
pnc_net_total	Total nights under net
pnc_intent_1	1 - Would you like to delay another pregnancy?	1	Yes
		2	No
use_fp_1	1 - Currently using FP method	1	Yes
		2	No
pnc_intent_2	2 - Would you like to delay another pregnancy?	1	Yes
		2	No
use_fp_2	2 - Currently using FP method	1	Yes
		2	No
pnc_intent_3	3 - Would you like to delay another pregnancy?	1	Yes
		2	No
use_fp_3	3 - Currently using FP method	1	Yes
		2	No
pnc_intent_4	4 - Would you like to delay another pregnancy?	1	Yes
		2	No
use_fp_4	4 - Currently using FP method	1	Yes
		2	No
pnc_attempts	How many attempts were made by phone to reach this participant
physically_traced	Physically traced?	1	Yes
		2	No
tracing_outcome	Outcome of tracing	1	Located subject
		2	Did not locate subject
pnc_strategy	Were additional strategies used to trace this participant?	1	Yes
		2	No
pnc_person_status	Is this person lost to follow up?	0	No
		1	Yes
pnc_agree	Do you agree to participate	1	Yes - Ndio
		2	No - La
pnc_date	Date of data collection/interview
pnc_location	Location of the interview	1	Home
		2	Facility
		3	Other
pnc_q1	1. What day was your baby born (the one who is close to 1 year old now)? Mtoto wako alizaliwa siku gani (ambaye yuko karibu kutimiza mwaka 1)?
pnc_q1age	Age of baby in months
pnc_born	1a. Where was your baby born? Mtoto wako alizaliwa wapi?	1	Facility - Kituo cha Afya
		2	Home - Nyumbani
		3	Transit/Other - Njiani/Nyingine
pnc_same_fac	ii. Was this the same facility where you received ANC? Je hii ndio kituo ambapo ulipata huduma yako ya ANC?	1	Yes - Ndio
		2	No - La
pnc_q2	2. Is the baby still alive? Mtoto huyu bado yungali hai?	1	Yes - Ndio
		2	No - La
pnc_q2i	2(i). When did your baby die? Mtoto wako aliaga lini?
pnc_q2i_age	Age of baby in months
pnc_q2ii	2(ii). What do you think caused your baby to die? Unadhani ni nini kilisababisha mtoto wako kuaga?	1	Diarrheal disease - a. Ugonjwa wa kuhara
		2	Respiratory infection including pneumonia or flu - b. Maambukizi ya njia ya kupumua ikiwemo pneumonia au mafua
		3	Malaria
		4	Other fever/infection - Joto mwilini/maambukizi
		5	Congenital problem (problem they were born with) - Ugonjwa wa kuzaliwa nao
		6	Born too early/too small - Mtoto alizaliwa mapema/alikuwa mdogo sana
		7	Dont know - Sijui
		8	Other - Nyingine
pnc_q2iii	2(iii). This survey has questions about your health and care and your babys health and care before they died. Is it OK if we ask you these questions? Utafiti huu una maswali kuhusu Afya na malezi yako na pia kuhusu afya na malezi ya mtoto wako kabla aa	1	Yes - Ndio
		2	No - La
pnc_q4	4. Since [pnc_q3]s birth how many Healthy Mother Healthy Baby meetings have you attended? Tangu kuzaliwa kwa [pnc_q3] umehudhuria mikutano mingapi ya mama mwenye afya mtoto mwenye afya?	0	0
		1	1
		2	2
		3	3
		4	4
pnc_q4b___1	4b. What was the biggest reason you did not attend any Healthy Mother Healthy Baby meetings? Sababu kuu ya wewe kutohudhuria mkutano wowote wa mama mwenye Afya mtoto mwenye Afya ilikuwa ipi? (choice=I did not know about them/didnt receive notification o	0	Unchecked
		1	Checked
pnc_q4b___2	4b. What was the biggest reason you did not attend any Healthy Mother Healthy Baby meetings? Sababu kuu ya wewe kutohudhuria mkutano wowote wa mama mwenye Afya mtoto mwenye Afya ilikuwa ipi? (choice=I was not in the area/moved to a different area after	0	Unchecked
		1	Checked
pnc_q4b___3	4b. What was the biggest reason you did not attend any Healthy Mother Healthy Baby meetings? Sababu kuu ya wewe kutohudhuria mkutano wowote wa mama mwenye Afya mtoto mwenye Afya ilikuwa ipi? (choice=Husband or mother in law did not want me to attend - M	0	Unchecked
		1	Checked
pnc_q4b___4	4b. What was the biggest reason you did not attend any Healthy Mother Healthy Baby meetings? Sababu kuu ya wewe kutohudhuria mkutano wowote wa mama mwenye Afya mtoto mwenye Afya ilikuwa ipi? (choice=It didnt sound appealing to me/I didnt want to go - Ha	0	Unchecked
		1	Checked
pnc_q4b___5	4b. What was the biggest reason you did not attend any Healthy Mother Healthy Baby meetings? Sababu kuu ya wewe kutohudhuria mkutano wowote wa mama mwenye Afya mtoto mwenye Afya ilikuwa ipi? (choice=It was too hard to get to the clinic - Ilikuwa vigumu	0	Unchecked
		1	Checked
pnc_q4b___6	4b. What was the biggest reason you did not attend any Healthy Mother Healthy Baby meetings? Sababu kuu ya wewe kutohudhuria mkutano wowote wa mama mwenye Afya mtoto mwenye Afya ilikuwa ipi? (choice=Other - Nyingine)	0	Unchecked
		1	Checked
pnc_q5a	5a. Family planning counseling Ushauri kuhusu upangaji uzazi	1	Yes - Ndio
		2	No - La
pnc_q5b	5b. A method of Family planning (for example injectables an implant or oral contraceptives) Mbinu ya upangaji uzazi	1	Yes - Ndio
		2	No - La
pnc_q5c	5c. Your blood pressure taken Ulipimwa shinikisho la damu	1	Yes - Ndio
		2	No - La
pnc_q5d	5d. Any immunisations (for you not your baby) Chanjo yoyote (yako wala sio ya mtoto wako)	1	Yes - Ndio
		2	No - La
pnc_q5e	5e. Care related to depression or your mental health (that is how you were thinking or feeling emotionally) Malezi yahusianayo na mafadhaiko au Afya ya kiakili (yaani namna ulivyokuwa unafikiria au kuhisi)	1	Yes - Ndio
		2	No - La
pnc_q5f	5f. Care for any other problem or concern with your health Malezi ya matatizo yoyote au wasiwasi kuhusu afya yako	1	Yes - Ndio
		2	No - La
pnc_q6a	6a. Well-child care: that is not because he/she was sick but to receive immunizations vitamin A or growth monitoring? Include immunization days or campaigns Huduma ya watoto: Yaani sio kwa sababu alikuwa mgonjwa lakini kupokea chanjo vitamin A au
pnc_q6b	6b. A problem: that is [pnc_q3] was sick or there was something worrying you about his/her health Tatizo: yaani [pnc_q3] alikuwa mgonjwa au kulikuwa na kitu kingine kilikuwa kinakupa wasiwasi kuhusu afya yake
pnc_q7a	7a. Diarrhea Kuhara
pnc_q7b	7b. A fever Joto Mwilini
pnc_q7c	7c. A cough Kukohoa
pnc_q7d	7d. Fast short rapid breaths or difficulty breathing not caused by a blocked or runny nose Kupumua kwa haraka fupi fupi au matatizo katika kupumua ambayo haijasababishwa na kuzibwa au kuwa na makamasi
pnc_q8a	8a. I would like to know how much [pnc_q3] was given to drink. This includes breastmilk Oral Rehydration Salt solution (ORS) and other liquids given with medicine. During the last time [pnc_q3] had diarrhoea was (he/she) given Ningependa kufahamu alip	1	Less than usual to drink - Kidogo alivyostahili kunywa
		2	About the same amount - Takriban kiwango sawa
		3	More than usual - Nyingi kushinda kawaida
		4	Dont know/Dont remember - Sijui/Sikumbuki
pnc_q8b	8b. Was either home-made or store bought oral rehydration salt solution (ORS) given? ORS itengenezwayo nyumbani au kununuliwa dukani ilipeanwa?	1	Yes - Ndio
		2	No - La
		3	Dont know/Dont remember - Sijui/Sikumbuki
pnc_q8c	8c. Were zinc tablets given? Tembe za zinc zilipeanwa?	1	Yes - Ndio
		2	No - La
		3	Dont know/Dont remember - Sijui/Sikumbuki
pnc_q8d	8d. During the time [pnc_q3] had diarrhea was (he/she) given Wakati huo [pnc_q3] alipokuwa anahara alipewa	1	Less than usual to eat - Chakula kidogo kuliko alivyostahili kula
		2	About the same amount to eat - Takriban kiwango cha chakula sawa na alivyotakiwa kula
		3	More than usual to eat - Chakula kingi kushinda kawaida ili kula
		4	Nothing to eat - Hakupewa chakula chochote kula?
		5	Dont know/Dont remember - Sijui/Sikumbuki
pnc_q8e	8e. Did you seek any advice or treatment from a health center clinic or hospital Ulitafuta ushauri au matibabu kutoka kwa kituo cha Afya Kliniki au hospitali?	1	Yes - Ndio
		2	No - La
		3	Dont know/Dont remember - Sijui/Sikumbuki
pnc_q9a	9a. At any time when your child had a fever did they have blood taken from his/her finger or heel for testing Wakati wowote ambao mtoto wako alikuwa na joto mwilini damu ilitolewa kidoleni au katika kisigino chake kwa ajili ya kupimwa?	1	Yes - Ndio
		2	No - La
		3	Dont know/Dont remember - Sijui/Sikumbuki
pnc_q9b	9b. Did you seek any advice or treatment from a health centre clinic or hospital Ulitafuta ushauri au matibabu kutoka kwa kituo cha Afya Kliniki au hospitali?	1	Yes - Ndio
		2	No - La
pnc_q10	10. The last time [pnc_q3] had a cough or difficulty breathing did you seek any advice or treatment from a health centre clinic or hospital Wakati wa mwisho [pnc_q3] alipokuwa na kikohozi au matatizo katika kupumua ulitafuta ushauri au matibabu kutoka	1	Yes - Ndio
		2	No - La
pnc_q11a	11a. Medication for malaria Tiba ya Malaria
pnc_q11b	11b. An antibiotic Kiua vijasumu
pnc_q12	12. Did you sleep under a bed net last night Jana usiku ulilala ndani ya neti ya kitanda	1	Yes - Ndio
		2	No - La
pnc_q13	13. Did [pnc_q3] baby sleep under a bed net last night Jana usiku [pnc_q3] alilala ndani ya neti ya kitanda?	1	Yes - Ndio
		2	No - La
pnc_q14	14. How old was [pnc_q3] when you last took an iron folate tablet (blood tonic) [pnc_q3] alikuwa na umri upi mara ya mwisho alipokunywa tembe zilizokuwa na madini ya kuthibiti damu mwilini
pnc_q15a	15a. Danger signs or problems to watch for in your baby Dalili za hatari au matatizo ya tazamia kwa mtoto wako	1	Yes - Ndio
		2	No - La
		3	Dont know/Dont remember - Sijui/Sikumbuki
pnc_q15b	15b. The importance of sleeping under a bed net Umuhimu wa kulala ndani ya neti ya kitanda	1	Yes - Ndio
		2	No - La
		3	Dont know/Dont remember - Sijui/Sikumbuki
pnc_q15c	15c. The importance of continuing to take iron and folic acid tablets after delivery (blood tonic) Umuhimu wa kuendelea kumeza tembe zilizo na madini ya Ayoni na Foliki kuthibiti damu baada ya kujifungua	1	Yes - Ndio
		2	No - La
		3	Dont know/Dont remember - Sijui/Sikumbuki
pnc_q15d	15d. Why immunisations are important and/how immunisations protect your child Umuhimu wa chanjo na namna chanjo zinavyomkinga mtoto wako?	1	Yes - Ndio
		2	No - La
		3	Dont know/Dont remember - Sijui/Sikumbuki
pnc_q15e	15e. Postpartum depression that is if you dont take joy in anything or are feeling sad or tired all the time since [pnc_q3] was born Mafadhaiko ya baada ya kujifungua yaani kama hufurahi chochote au umesononeka au kuchoka kila wakati tangu kuzaliwa kwa	1	Yes - Ndio
		2	No - La
		3	Dont know/Dont remember - Sijui/Sikumbuki
pnc_q16a___1	16a. Read books or looked at picture books with [pnc_q3] Kusoma kitabu au kuangalia kitabu cha picha kwa pamoja na [pnc_q3] (choice=Mother - Mama)	0	Unchecked
		1	Checked
pnc_q16a___2	16a. Read books or looked at picture books with [pnc_q3] Kusoma kitabu au kuangalia kitabu cha picha kwa pamoja na [pnc_q3] (choice=Father - Baba)	0	Unchecked
		1	Checked
pnc_q16a___3	16a. Read books or looked at picture books with [pnc_q3] Kusoma kitabu au kuangalia kitabu cha picha kwa pamoja na [pnc_q3] (choice=Other - Mwingine)	0	Unchecked
		1	Checked
pnc_q16a___4	16a. Read books or looked at picture books with [pnc_q3] Kusoma kitabu au kuangalia kitabu cha picha kwa pamoja na [pnc_q3] (choice=No one - Hakuna Yeyote)	0	Unchecked
		1	Checked
pnc_q16b___1	16b. Told stories to [pnc_q3] Kumhadithia [pnc_q3] (choice=Mother - Mama)	0	Unchecked
		1	Checked
pnc_q16b___2	16b. Told stories to [pnc_q3] Kumhadithia [pnc_q3] (choice=Father - Baba)	0	Unchecked
		1	Checked
pnc_q16b___3	16b. Told stories to [pnc_q3] Kumhadithia [pnc_q3] (choice=Other - Mwingine)	0	Unchecked
		1	Checked
pnc_q16b___4	16b. Told stories to [pnc_q3] Kumhadithia [pnc_q3] (choice=No one - Hakuna Yeyote)	0	Unchecked
		1	Checked
pnc_q16c___1	16c. Sang songs to or with [pnc_q3] including lullabies Mwimbia au imba na [pnc_q3] ikiwemo nyimbo za bembezi (choice=Mother - Mama)	0	Unchecked
		1	Checked
pnc_q16c___2	16c. Sang songs to or with [pnc_q3] including lullabies Mwimbia au imba na [pnc_q3] ikiwemo nyimbo za bembezi (choice=Father - Baba)	0	Unchecked
		1	Checked
pnc_q16c___3	16c. Sang songs to or with [pnc_q3] including lullabies Mwimbia au imba na [pnc_q3] ikiwemo nyimbo za bembezi (choice=Other - Mwingine)	0	Unchecked
		1	Checked
pnc_q16c___4	16c. Sang songs to or with [pnc_q3] including lullabies Mwimbia au imba na [pnc_q3] ikiwemo nyimbo za bembezi (choice=No one - Hakuna Yeyote)	0	Unchecked
		1	Checked
pnc_q16d___1	16d. Played with [pnc_q3] Cheza na [pnc_q3] (choice=Mother - Mama)	0	Unchecked
		1	Checked
pnc_q16d___2	16d. Played with [pnc_q3] Cheza na [pnc_q3] (choice=Father - Baba)	0	Unchecked
		1	Checked
pnc_q16d___3	16d. Played with [pnc_q3] Cheza na [pnc_q3] (choice=Other - Mwingine)	0	Unchecked
		1	Checked
pnc_q16d___4	16d. Played with [pnc_q3] Cheza na [pnc_q3] (choice=No one - Hakuna Yeyote)	0	Unchecked
		1	Checked
pnc_q16e___1	16e. Named counted or drew things for or with [pnc_q3] Patia jina kuhesabu au kuchorea/kuchora/kuchorea [pnc_q3]? (choice=Mother - Mama)	0	Unchecked
		1	Checked
pnc_q16e___2	16e. Named counted or drew things for or with [pnc_q3] Patia jina kuhesabu au kuchorea/kuchora/kuchorea [pnc_q3]? (choice=Father - Baba)	0	Unchecked
		1	Checked
pnc_q16e___3	16e. Named counted or drew things for or with [pnc_q3] Patia jina kuhesabu au kuchorea/kuchora/kuchorea [pnc_q3]? (choice=Other - Mwingine)	0	Unchecked
		1	Checked
pnc_q16e___4	16e. Named counted or drew things for or with [pnc_q3] Patia jina kuhesabu au kuchorea/kuchora/kuchorea [pnc_q3]? (choice=No one - Hakuna Yeyote)	0	Unchecked
		1	Checked
pnc_q17a	17a. In order to bring up raise or educate a child properly the child needs to be physically punished Ili kumkuza kumlea au kumuelimisha mtoto vizuri mtoto lazima aadhibiwe kwa kuchapwa	1	Not at all true - Sio kweli hata kidogo
		2	Slightly true - Ni Kweli kwa kiwango kidogo sana
		3	Somewhat true - Yana ukweli fulani
		4	Mostly true - Karibu yote ni kweli
		5	Completely true - Ni kweli kabisa
pnc_q17b	17b. There are things I can do to make my baby smarter/sharper/more intelligent Kuna vitu ambavyo naweza kuvifanya ili kumfanya mtoto wangu kuwa mwerevu zaidi	1	Not at all true - Sio kweli hata kidogo
		2	Slightly true - Ni Kweli kwa kiwango kidogo sana
		3	Somewhat true - Yana ukweli fulani
		4	Mostly true - Karibu yote ni kweli
		5	Completely true - Ni kweli kabisa
pnc_q17c	17c. Showing my baby I love them will help them develop and be healthier Kuonyesha mtoto wangu kuwa ninampenda itamsaidia kukuwa na kuwa mwenye Afya	1	Not at all true - Sio kweli hata kidogo
		2	Slightly true - Ni Kweli kwa kiwango kidogo sana
		3	Somewhat true - Yana ukweli fulani
		4	Mostly true - Karibu yote ni kweli
		5	Completely true - Ni kweli kabisa
pnc_q17d	17d. It is important for fathers to talk and play with their children Ni muhimu akina baba kuzungumza na kucheza na watoto wao	1	Not at all true - Sio kweli hata kidogo
		2	Slightly true - Ni Kweli kwa kiwango kidogo sana
		3	Somewhat true - Yana ukweli fulani
		4	Mostly true - Karibu yote ni kweli
		5	Completely true - Ni kweli kabisa
pnc_q18a	18a. The importance of talking with your baby Umuhimu wa kuzungumza na mwanawe	1	Yes - Ndio
		2	No - La
		3	Dont know/Dont remember - Sijui/Sikumbuki
pnc_q18b	18b. The importance of playing with your baby Umuhimu wa kucheza na mwanawe	1	Yes - Ndio
		2	No - La
		3	Dont know/Dont remember - Sijui/Sikumbuki
pnc_q18c	18c. What activities and behaviours you can expect your baby to be doing by age 1 Vitu na tabia ambazo utatarajia mtoto wako awe akifanya kufikia mwaka wa 1	1	Yes - Ndio
		2	No - La
		3	Dont know/Dont remember - Sijui/Sikumbuki
pnc_q18d	18d. Ways you can teach your child right from wrong without hitting or yelling Njia ya kumfunza mwanao kilicho kizuri na kibaya bila kumpiga au kuzungumza naye kwa sauti ya juu	1	Yes - Ndio
		2	No - La
		3	Dont know/Dont remember - Sijui/Sikumbuki
pnc_q19	19. Do you have a place to wash your hands in your home or yard Je una mahali pa kunawa mikono nyumbani au kwa ploti yako	1	Yes - Ndio
		2	No - La
pnc_q19i	19(i). May I see it Ninaomba kupaona?	1	Piped water/tap/sink observed - Maji ya mfereji/tapu/sinki ilionekana
		2	Other fixed station that allows one person to wash hands independently observed - Eneo lililotengwa na ambalo linamwezes
		3	Mobile object observed (bucket/jug/pitcher/kettle) - Chombo kinachoweza kuhamishwa kilionekana (ndoo/jagi/birika)
		4	No handwashing place observed - Mahali pa kunawia mkono hapakuonekana
pnc_q19ii	19(ii). Observe presence of water at the place for handwashing Thibitisha kwamba kuna maji katika eneo la kunawia mikono	1	Water is available - Maji yanapatikana
		2	Water is not available - Maji hayapatikani
pnc_q19iii	19(iii). Observe - is soap detergent or ash/mud/sand present at the place for handwashing Thibitisha kwamba kuna: - Sabuni ya kipande sabuni ya maji au poda/jivu/matope/mchanga unapatika kwenye eneo la kunawia mkono?	1	Yes soap/detergent present - Ndio sabuni ya kipande sabuni ya maji au ya poda ipo
		2	Yes ash/mud/sand present - Ndio jivu/matope/mchanga upo
		3	No nothing present - La hakuna chochote
pnc_q20a	20a. Clean safe water is always available in the house for drinking Maji safi na salama ya kunywa yanapatika nyumbani kila wakati	1	Not at all true - Sio kweli hata kidogo
		2	Slightly true - Ni Kweli kwa kiwango kidogo sana
		3	Somewhat true - Yana ukweli fulani
		4	Mostly true - Karibu yote ni kweli
		5	Completely true - Ni kweli kabisa
pnc_q20b	20b. [pnc_q3] has not been fed with a bottle or cup with a teat [pnc_q3] hajalishwa na chupa au kikombe kilicho na titi	1	Not at all true - Sio kweli hata kidogo
		2	Slightly true - Ni Kweli kwa kiwango kidogo sana
		3	Somewhat true - Yana ukweli fulani
		4	Mostly true - Karibu yote ni kweli
		5	Completely true - Ni kweli kabisa
pnc_q20c	20c. My yard is kept clean and free of chicken or other feces Ploti yangu inawekwa safi na bila kinyesi cha kuku au kinyesi chochote	1	Not at all true - Sio kweli hata kidogo
		2	Slightly true - Ni Kweli kwa kiwango kidogo sana
		3	Somewhat true - Yana ukweli fulani
		4	Mostly true - Karibu yote ni kweli
		5	Completely true - Ni kweli kabisa
pnc_q20d	20d. All animal and human feces including babys and nappy water is disposed of in latrine compost or trash bin Kinyesi chote cha binadamu na wanyama ikiwemo cha mtoto na maji ya nepi yanamwagwa chooni shimo ya uchafu au kifaa cha kuwekea uchafu	1	Not at all true - Sio kweli hata kidogo
		2	Slightly true - Ni Kweli kwa kiwango kidogo sana
		3	Somewhat true - Yana ukweli fulani
		4	Mostly true - Karibu yote ni kweli
		5	Completely true - Ni kweli kabisa
pnc_q20e	20e. [pnc_q3] is successfully preventted from eating soil or chicken feces [pnc_q3] anazuiwa vilivyo kutokula mchanga au kinyesi cha kuku	1	Not at all true - Sio kweli hata kidogo
		2	Slightly true - Ni Kweli kwa kiwango kidogo sana
		3	Somewhat true - Yana ukweli fulani
		4	Mostly true - Karibu yote ni kweli
		5	Completely true - Ni kweli kabisa
pnc_q20f	20f. [pnc_q3] is always supervised [pnc_q3] anaangaliwa kila wakati	1	Not at all true - Sio kweli hata kidogo
		2	Slightly true - Ni Kweli kwa kiwango kidogo sana
		3	Somewhat true - Yana ukweli fulani
		4	Mostly true - Karibu yote ni kweli
		5	Completely true - Ni kweli kabisa
pnc_q21	21. Is [pnc_q3] still breastfeeding [pnc_q3] bado ananyonya?	1	Yes - Ndio
		2	No - La
pnc_q21i	21(i). At what age did you stop breastfeeding [pnc_q3] Uliacha kumnyonyesha [pnc_q3] akiwa na umri upi?	1	Never breastfed - Hakuwahi kunyonya
		2	Age in months - Umri katika miezi
		3	Dont know/Dont remember - Sijui/Sikumbuki
pnc_q21i_age	Age in months
pnc_q22a	22a. A non-breastmilk liquid such as water formula cow/goat milk sugar water tea or fruit juice Kinywaji kingine ambayo sio maziwa ya mama kwa mfano maji maziwa ya watoto wachanga ya kukoroga maziwa ya ng`ombe/ mbuzi maji ya sukari chai au	1	Months - Miezi
		2	Dont know/Dont remember - Sijui/Sikumbuki
		3	Not given yet - Hajapewa bado
		4	Not given prior to death - Hakupewa kabla ya kuaga
pnc_q22a_months	Months
pnc_q22b	22b. Thin porridge (from maize rice etc.) Uji mwepesi (ya mahindi mchele n.k)	1	Months - Miezi
		2	Dont know/Dont remember - Sijui/Sikumbuki
		3	Not given yet - Hajapewa bado
		4	Not given prior to death - Hakupewa kabla ya kuaga
pnc_q22b_months	Months
pnc_q22c	22c. Fish or meat (chicken beef goat etc.) Samaki au nyama (kuku mbuzi ng`ombe n.k)	1	Months - Miezi
		2	Dont know/Dont remember - Sijui/Sikumbuki
		3	Not given yet - Hajapewa bado
		4	Not given prior to death - Hakupewa kabla ya kuaga
pnc_q22c_months	Months
pnc_q22d	22d. Sugar sweetened drinks like soda juice or sweetened milk Vinywaji vingine vilivyo na sukari mfano soda sharubati (maji ya matunda) au maziwa yaliyo na sukari	1	Months - Miezi
		2	Dont know/Dont remember - Sijui/Sikumbuki
		3	Not given yet - Hajapewa bado
		4	Not given prior to death - Hakupewa kabla ya kuaga
pnc_q22d_months	Months
pnc_q22e	22e. Any food or drink other than breastmilk Chakula kingine au kinywaji isipokuwa maziwa ya mama	1	Months - Miezi
		2	Dont know/Dont remember - Sijui/Sikumbuki
		3	Not given yet - Hajapewa bado
		4	Not given prior to death - Hakupewa kabla ya kuaga
pnc_q22e_months	Months
pnc_q23	23. At what age should a baby first start to receive liquid or food other than breastmilk Ni umri upi ambapo mtoto anastahili kuanza kupewa vinywaji au chakula kingine kando na maziwa ya mama?
pnc_q24	24. At what age should a baby first start to receive foods from animal sources such as fish meat eggs or diary Ni umri upi ambapo mtoto anastahili kuanza kupewa nyama mfano samaki nyama mayai au maziwa?
pnc_q25___1	25. What are some reasons it is best not to give babies less than 6 months old anything but breastmilk? Ni baadhi ya sababu zipi ambazo ni vyema kutompa mtoto aliye chini ya umri wa miezi sita kitu kingine chochote isipokuwa maziwa ya mama? (choice=Brea	0	Unchecked
		1	Checked
pnc_q25___2	25. What are some reasons it is best not to give babies less than 6 months old anything but breastmilk? Ni baadhi ya sababu zipi ambazo ni vyema kutompa mtoto aliye chini ya umri wa miezi sita kitu kingine chochote isipokuwa maziwa ya mama? (choice=Brea	0	Unchecked
		1	Checked
pnc_q25___3	25. What are some reasons it is best not to give babies less than 6 months old anything but breastmilk? Ni baadhi ya sababu zipi ambazo ni vyema kutompa mtoto aliye chini ya umri wa miezi sita kitu kingine chochote isipokuwa maziwa ya mama? (choice=Befo	0	Unchecked
		1	Checked
pnc_q25___4	25. What are some reasons it is best not to give babies less than 6 months old anything but breastmilk? Ni baadhi ya sababu zipi ambazo ni vyema kutompa mtoto aliye chini ya umri wa miezi sita kitu kingine chochote isipokuwa maziwa ya mama? (choice=Feed	0	Unchecked
		1	Checked
pnc_q25___5	25. What are some reasons it is best not to give babies less than 6 months old anything but breastmilk? Ni baadhi ya sababu zipi ambazo ni vyema kutompa mtoto aliye chini ya umri wa miezi sita kitu kingine chochote isipokuwa maziwa ya mama? (choice=Feed	0	Unchecked
		1	Checked
pnc_q25___6	25. What are some reasons it is best not to give babies less than 6 months old anything but breastmilk? Ni baadhi ya sababu zipi ambazo ni vyema kutompa mtoto aliye chini ya umri wa miezi sita kitu kingine chochote isipokuwa maziwa ya mama? (choice=Feed	0	Unchecked
		1	Checked
pnc_q25___7	25. What are some reasons it is best not to give babies less than 6 months old anything but breastmilk? Ni baadhi ya sababu zipi ambazo ni vyema kutompa mtoto aliye chini ya umri wa miezi sita kitu kingine chochote isipokuwa maziwa ya mama? (choice=Othe	0	Unchecked
		1	Checked
pnc_q26___1	26. If a mother thinks her baby is not getting enough breastmilk what should she do? Iwapo mama anahisi kuwa mtoto wake hapati maziwa ya kutosha anastahili kufanya nini? (choice=Breastfeed more often/more frequently - Mnyonyeshe kila mara)	0	Unchecked
		1	Checked
pnc_q26___2	26. If a mother thinks her baby is not getting enough breastmilk what should she do? Iwapo mama anahisi kuwa mtoto wake hapati maziwa ya kutosha anastahili kufanya nini? (choice=Breastfeed for a longer period at each feeding - Mnyonyesha kwa kipindi ki	0	Unchecked
		1	Checked
pnc_q26___3	26. If a mother thinks her baby is not getting enough breastmilk what should she do? Iwapo mama anahisi kuwa mtoto wake hapati maziwa ya kutosha anastahili kufanya nini? (choice=Empty each breast at each feeding/empty one breast before switching to the	0	Unchecked
		1	Checked
pnc_q26___4	26. If a mother thinks her baby is not getting enough breastmilk what should she do? Iwapo mama anahisi kuwa mtoto wake hapati maziwa ya kutosha anastahili kufanya nini? (choice=Mother needs to drink more water/fluids - Mama anywe maji/vinywaji vingi)	0	Unchecked
		1	Checked
pnc_q26___5	26. If a mother thinks her baby is not getting enough breastmilk what should she do? Iwapo mama anahisi kuwa mtoto wake hapati maziwa ya kutosha anastahili kufanya nini? (choice=Mother needs to eat more food - Mama ale chakula kingi)	0	Unchecked
		1	Checked
pnc_q26___6	26. If a mother thinks her baby is not getting enough breastmilk what should she do? Iwapo mama anahisi kuwa mtoto wake hapati maziwa ya kutosha anastahili kufanya nini? (choice=Give baby other liquids/foods - Mpe mtoto vyakula/vinywaji vingine)	0	Unchecked
		1	Checked
pnc_q26___7	26. If a mother thinks her baby is not getting enough breastmilk what should she do? Iwapo mama anahisi kuwa mtoto wake hapati maziwa ya kutosha anastahili kufanya nini? (choice=Other - Nyingine)	0	Unchecked
		1	Checked
pnc_q27a	27a. How many times did he/she breastfeed Ni mara ngapi amenyonya
pnc_q27b	27b. How many times did they eat solid semi-solid or soft foods including snacks Ni mara ngapi amekula chakula kigumu kisicho kigumu teputevu ikiwemo kumbwe
pnc_q27c	27c. Did they eat any foods from an animal source like meat fish eggs or dairy Walikula chakula chochote kitokanacho na wanyama mfano nyama samaki mayai au maziwa?	1	Yes - Ndio
		2	No - La
		3	Not sure - Sina Uhakika
pnc_q27d	27d. Did they eat any grains roots or tubers Walikula nafaka yoyote au mizizi	1	Yes - Ndio
		2	No - La
		3	Not sure - Sina Uhakika
pnc_q27e	27e. Did they eat any legumes (beans peas) seeds nuts or lentils Walikula jamii kunde yoyote (maharage mbaazi) tambe njugu au dengu?	1	Yes - Ndio
		2	No - La
		3	Not sure - Sina Uhakika
pnc_q27f	27f. Did they eat any fruits and vegetables Walikula aina zozote za matunda na mboga?	1	Yes - Ndio
		2	No - La
		3	Not sure - Sina Uhakika
pnc_q27g	27g. Did they eat any sugary drinks or sweets Walikula vinywaji vyovyote vya sukari au peremende	1	Yes - Ndio
		2	No - La
		3	Not sure - Sina Uhakika
pnc_q28a	28a. How to use breastfeeding to prevent another pregnancy right away a method called lactational amenorrhea method or LAM Jinsi ya kutumia kunyonyesha kuzuia kupata ujauzito pindi tu mbinu iitwayo lactational amenorrhea au LAM	1	Yes - Ndio
		2	No - La
		3	Dont know/Dont remember - Sijui/Sikumbuki
pnc_q28b	28b. How to increase your milk supply if needed Jinsi ya kuongeza maziwa iwapo unahitajika	1	Yes - Ndio
		2	No - La
		3	Dont know/Dont remember - Sijui/Sikumbuki
pnc_q28c	28c. Eating extra food while breastfeeding Kula chakula kingi unapokuwa unanyonyesha	1	Yes - Ndio
		2	No - La
		3	Dont know/Dont remember - Sijui/Sikumbuki
pnc_q28d	28d. When to introduce fluids and foods other than breastmilk to your baby Wakati wa kuanzisha vinywaji na vyakula vingine kando na kunyonyesha mtoto wako	1	Yes - Ndio
		2	No - La
		3	Dont know/Dont remember - Sijui/Sikumbuki
pnc_q28e	28e. Feeding your baby from their own separate bowl/plate Kulisha mtoto kutoka kwa sahani yake mwenyewe	1	Yes - Ndio
		2	No - La
		3	Dont know/Dont remember - Sijui/Sikumbuki
pnc_q28f	28f. Feeding your baby a variety of foods everyday Kumlisha mwanao aina mbalimbali ya vyakula kila siku	1	Yes - Ndio
		2	No - La
		3	Dont know/Dont remember - Sijui/Sikumbuki
pnc_q28g	28g. Feeding your baby foods from animal sources Kumliisha mwanao vyakula vitokanavyo kwa mnyama	1	Yes - Ndio
		2	No - La
		3	Dont know/Dont remember - Sijui/Sikumbuki
pnc_q28h	28h. Feeding your baby colorful fruits and vegetables Kumliisha mwanao matunda na mboga vyenye rangi tofauti tofauti	1	Yes - Ndio
		2	No - La
		3	Dont know/Dont remember - Sijui/Sikumbuki
pnc_q28i	28i. Avoiding sugary drinks and sweets Kuepuka vinywaji vya sukari na peremende	1	Yes - Ndio
		2	No - La
		3	Dont know/Dont remember - Sijui/Sikumbuki
pnc_q29	29. Who will usually make decisions about health care for yourself and your newborn Nani kwa kawaida hufanya maamuzi ya kiafya ya mtoto wako na yako?	1	You - Wewe
		2	Your husband/partner - Mme wako/mwenzio
		3	You and your husband/partner jointly - Wewe na mme/mwenzio kwa ushirikiano
		4	Someone else - Mtu mwingine
pnc_q30	30. Would you say that using contraception is mainly Unaweza kusema kuwa kutumia mbinu ya upangaji uzazi kwa kiasi kikubwa ni	1	Your decision - Uamuzi wako
		2	Your husband/partners decision - Uamuzi wa mme/mwenza wako
		3	Joint decision - Maamuzi ya nyote wawili
		4	Other - Nyingine
pnc_q31a	31a. Feed my baby in a way that helps prevent problems and keeps my baby healthy Lisha mtoto kwa namna ambayo inasaidia kuzuia matatizo na kumfanya mtoto awe mwenye afya	0	0
		1	1
		2	2
		3	3
		4	4
		5	5
		6	6
		7	7
		8	8
		9	9
		10	10
pnc_q31b	31b. Help my babys brain grow and stronger/smarter Saidia ubongo wa mtoto kukua na kuwa mwerevu	0	0
		1	1
		2	2
		3	3
		4	4
		5	5
		6	6
		7	7
		8	8
		9	9
		10	10
pnc_q31c	31c. Prevent serious accidents from happening to my baby Zuia ajali mbaya kutokea kwa mtoto	0	0
		1	1
		2	2
		3	3
		4	4
		5	5
		6	6
		7	7
		8	8
		9	9
		10	10
pnc_q31d	31d. Recognise a health problem with an infant or small child Tambua tatizo la kiafya kwa mtoto mchanga au mtoto mdogo	0	0
		1	1
		2	2
		3	3
		4	4
		5	5
		6	6
		7	7
		8	8
		9	9
		10	10
pnc_q31e	31e. Take action to help an infant or small child with a health problem Chukua hatua ya kumsaidia mtoto mchanga au mtoto mdogo aliye na tatizo la kiafya	0	0
		1	1
		2	2
		3	3
		4	4
		5	5
		6	6
		7	7
		8	8
		9	9
		10	10
pnc_q31f	31f. Make good decisions related to the health of myself and my family Fanya maamuzi bora yahusianayo na afya yako na ya familia yangu	0	0
		1	1
		2	2
		3	3
		4	4
		5	5
		6	6
		7	7
		8	8
		9	9
		10	10
pnc_q31g	31g. Bring up difficult subjects with my husband Zungumza mambo tata na mme wako	0	0
		1	1
		2	2
		3	3
		4	4
		5	5
		6	6
		7	7
		8	8
		9	9
		10	10
pnc_q31h	31h. Bring up difficult subjects with my mother in law Zungumza mambo tata na mama mkwe wako	0	0
		1	1
		2	2
		3	3
		4	4
		5	5
		6	6
		7	7
		8	8
		9	9
		10	10
pnc_q31i	31i. Share my knowledge and let others know what I really think even if it is different from what they know or think Shiriki maarifa yangu na kuwafanya wengine kufahamu kile ambacho ninachofikiria hata kama ni tofauti na wajuayo au wafikiriayo	0	0
		1	1
		2	2
		3	3
		4	4
		5	5
		6	6
		7	7
		8	8
		9	9
		10	10
pnc_q31j	31j. Ask a provider to explain something in a different way if I dont understand what they are telling me Kumuuliza mhudumu kueleza jambo kwa njia tofauti iwapo sielewi wanachoniambia	0	0
		1	1
		2	2
		3	3
		4	4
		5	5
		6	6
		7	7
		8	8
		9	9
		10	10
pnc_q31k	31k. Make decisions for myself Jifanyia maamuzi	0	0
		1	1
		2	2
		3	3
		4	4
		5	5
		6	6
		7	7
		8	8
		9	9
		10	10
pnc_q32a	32a. [pnc_q3]s father helps(ed) to take care of him/her such as by bathing/feeding/playing (not just providing money) Baba ya [pnc_q3] anakusaidia/alikusaidia kumtunza mfano kumwogesha/kumlisha/kucheza naye (sio tu kupeana pesa)	1	Not at all true - Sio kweli hata kidogo
		2	Slightly true - Ni Kweli kwa kiwango kidogo sana
		3	Somewhat true - Yana ukweli fulani
		4	Mostly true - Karibu yote ni kweli
		5	Completely true - Ni kweli kabisa
pnc_q32b	32b. He supports(ed) you with breastfeeding Alikusaidia wakati wa kunyonyesha	1	Not at all true - Sio kweli hata kidogo
		2	Slightly true - Ni Kweli kwa kiwango kidogo sana
		3	Somewhat true - Yana ukweli fulani
		4	Mostly true - Karibu yote ni kweli
		5	Completely true - Ni kweli kabisa
pnc_q32c	32c. He let you rest while you were pregnant and when [pnc_q3] was small Alikuacha upumzike ulipokuwa na ujauzito na [pnc_q3] alipokuwa mdogo	1	Not at all true - Sio kweli hata kidogo
		2	Slightly true - Ni Kweli kwa kiwango kidogo sana
		3	Somewhat true - Yana ukweli fulani
		4	Mostly true - Karibu yote ni kweli
		5	Completely true - Ni kweli kabisa
pnc_q32d	32d. He helped you/allowed you extra food while pregnant and nursing Alikusaidia/alikukubalia uongezee kiasi cha chakula ulipokuwa na ujauzito na ulipokuwa unanyonyesha	1	Not at all true - Sio kweli hata kidogo
		2	Slightly true - Ni Kweli kwa kiwango kidogo sana
		3	Somewhat true - Yana ukweli fulani
		4	Mostly true - Karibu yote ni kweli
		5	Completely true - Ni kweli kabisa
pnc_q33a	33a. How to help our baby grow smarter/sharper/more intelligent Namna ya kumsaidia mtoto kuwa	1	None - Hapana hata kidogo
		2	A little - Ni kwa kiwango Kidogo tu
		3	Some - Kwa kiwango fulani
		4	Quite a bit - Kwa kiasi kikubwa
		5	A lot - Sana
pnc_q33b	33b. How to help our baby stay healthy and well nourished Namna ya kumfanya mtoto kuwa mwenye Afya na virutubishi	1	None - Hapana hata kidogo
		2	A little - Ni kwa kiwango Kidogo tu
		3	Some - Kwa kiwango fulani
		4	Quite a bit - Kwa kiasi kikubwa
		5	A lot - Sana
pnc_q33c	33c. How to keep our baby safe and prevent accidents Namna ya kumuweka mtoto wako salama na kumwepusha na ajali	1	None - Hapana hata kidogo
		2	A little - Ni kwa kiwango Kidogo tu
		3	Some - Kwa kiwango fulani
		4	Quite a bit - Kwa kiasi kikubwa
		5	A lot - Sana
pnc_q33d	33d. What family size we want Ukubwa wa familia mwitakayo	1	None - Hapana hata kidogo
		2	A little - Ni kwa kiwango Kidogo tu
		3	Some - Kwa kiwango fulani
		4	Quite a bit - Kwa kiasi kikubwa
		5	A lot - Sana
pnc_q33e	33e. If and when we want to have another baby Iwapo na lini kuwa na mtoto mwingine	1	None - Hapana hata kidogo
		2	A little - Ni kwa kiwango Kidogo tu
		3	Some - Kwa kiwango fulani
		4	Quite a bit - Kwa kiasi kikubwa
		5	A lot - Sana
pnc_q33f	33f. What family planning method wed like to use (including none) Mbinu ya upangaji uzazi ambayo mngependa kuitumia(ikiwemo kutokutumia yoyote)	1	None - Hapana hata kidogo
		2	A little - Ni kwa kiwango Kidogo tu
		3	Some - Kwa kiwango fulani
		4	Quite a bit - Kwa kiasi kikubwa
		5	A lot - Sana
pnc_q34a	34a. We agree on what size family we want Tunakubaliana ukubwa wa familia tunayoitaka	1	Not at all true - Sio kweli hata kidogo
		2	Slightly true - Ni Kweli kwa kiwango kidogo sana
		3	Somewhat true - Yana ukweli fulani
		4	Mostly true - Karibu yote ni kweli
		5	Completely true - Ni kweli kabisa
pnc_q34b	34b. We agree on if and when we want to have another baby Tunakubaliana iwapo na lini tunataka kuwa na mtoto	1	Not at all true - Sio kweli hata kidogo
		2	Slightly true - Ni Kweli kwa kiwango kidogo sana
		3	Somewhat true - Yana ukweli fulani
		4	Mostly true - Karibu yote ni kweli
		5	Completely true - Ni kweli kabisa
pnc_q34c	34c. We agree on what form(s) of family planning wed like to use (including none) Tunakubaliana kuhusu aina ya mbinu za upangaji uzazi ambayo tungependa kutumia (ikiwemo kutokutumia yoyote)	1	Not at all true - Sio kweli hata kidogo
		2	Slightly true - Ni Kweli kwa kiwango kidogo sana
		3	Somewhat true - Yana ukweli fulani
		4	Mostly true - Karibu yote ni kweli
		5	Completely true - Ni kweli kabisa
pnc_q35a	35a. I was able to ask questions and they were answered in a way I understood Niliweza kuuliza maswali na yalijibiwa kwa namna ambayo nilielewa	1	Not at all true - Sio kweli hata kidogo
		2	Slightly true - Ni Kweli kwa kiwango kidogo sana
		3	Somewhat true - Yana ukweli fulani
		4	Mostly true - Karibu yote ni kweli
		5	Completely true - Ni kweli kabisa
pnc_q35b	35b. I learned important information about how to keep myself and my baby healthy Nilijifunza habari muhimu kuhusu namna ya kujiweka mimi na mtoto wangu kuwa wenye Afya nzuri	1	Not at all true - Sio kweli hata kidogo
		2	Slightly true - Ni Kweli kwa kiwango kidogo sana
		3	Somewhat true - Yana ukweli fulani
		4	Mostly true - Karibu yote ni kweli
		5	Completely true - Ni kweli kabisa
pnc_q35c	35c. I never left visits with questions or confused about some things Sikutoka ziarani nikiwa na maswali au na wasiwasi kuhusu mambo mengine	1	Not at all true - Sio kweli hata kidogo
		2	Slightly true - Ni Kweli kwa kiwango kidogo sana
		3	Somewhat true - Yana ukweli fulani
		4	Mostly true - Karibu yote ni kweli
		5	Completely true - Ni kweli kabisa
pnc_q35d	35d. The provider always showed me respect and acted in respectful ways Mhudumu alinionyesha heshima na alijibeba kwa njia ya heshima	1	Not at all true - Sio kweli hata kidogo
		2	Slightly true - Ni Kweli kwa kiwango kidogo sana
		3	Somewhat true - Yana ukweli fulani
		4	Mostly true - Karibu yote ni kweli
		5	Completely true - Ni kweli kabisa
pnc_q35e	35e. If I have another child I would be happy to receive care similar to what I received during this last year Iwapo nitakuwa na mtoto mwingine ningefurahia kupokea malezi kama yale niliyoyapokea huu mwaka uliopita	1	Not at all true - Sio kweli hata kidogo
		2	Slightly true - Ni Kweli kwa kiwango kidogo sana
		3	Somewhat true - Yana ukweli fulani
		4	Mostly true - Karibu yote ni kweli
		5	Completely true - Ni kweli kabisa
pnc_q35f	35f. I would recommend to a friend to go to the same place for care for their child and/or themselves Ningempendekezea rafiki kuendea malezi ya wanao na/au yao binafsi katika eneo sawa	1	Not at all true - Sio kweli hata kidogo
		2	Slightly true - Ni Kweli kwa kiwango kidogo sana
		3	Somewhat true - Yana ukweli fulani
		4	Mostly true - Karibu yote ni kweli
		5	Completely true - Ni kweli kabisa
pnc_q35g	35g. I always had enough time with the provider Nilikuwa na muda wa kutosha na mhudumu kila mara	1	Not at all true - Sio kweli hata kidogo
		2	Slightly true - Ni Kweli kwa kiwango kidogo sana
		3	Somewhat true - Yana ukweli fulani
		4	Mostly true - Karibu yote ni kweli
		5	Completely true - Ni kweli kabisa
pnc_q35h	35h. I am very satisfied with the care my baby and I have received since birth Niliridhika sana na malezi ambayo mimi na mtoto wangu tumepokea tangu kuzaliwa kwa mtoto wangu	1	Not at all true - Sio kweli hata kidogo
		2	Slightly true - Ni Kweli kwa kiwango kidogo sana
		3	Somewhat true - Yana ukweli fulani
		4	Mostly true - Karibu yote ni kweli
		5	Completely true - Ni kweli kabisa
pnc_q36	36. Imagine you were to have another baby. If you could choose would you prefer individual one on one care in the year after birth or would you prefer group visits where you and your baby receive your care with other women who have babies the same age?	1	Individual care - Malezi ya binafsi
		2	Group care - Malezi ya kikundi
		3	Unsure; doesnt matter which one; no preference - Sina uhakika;Haijalishi ni ipi;sina mapendeleo
pnc_q37a	37a. I was comfortable receiving care in a group Nilikuwa huru kupokea malezi katika kikundi	1	Not at all true - Sio kweli hata kidogo
		2	Slightly true - Ni Kweli kwa kiwango kidogo sana
		3	Somewhat true - Yana ukweli fulani
		4	Mostly true - Karibu yote ni kweli
		5	Completely true - Ni kweli kabisa
pnc_q37b	37b. I felt like I was part of the group Nilihisi kuwa nilikuwa mmoja wa wanakikundi	1	Not at all true - Sio kweli hata kidogo
		2	Slightly true - Ni Kweli kwa kiwango kidogo sana
		3	Somewhat true - Yana ukweli fulani
		4	Mostly true - Karibu yote ni kweli
		5	Completely true - Ni kweli kabisa
pnc_q37c	37c. I was comfortable talking and sharing thoughts with the group Nilikuwa huru kuzungumza na kupeana maoni kwenye kikundi	1	Not at all true - Sio kweli hata kidogo
		2	Slightly true - Ni Kweli kwa kiwango kidogo sana
		3	Somewhat true - Yana ukweli fulani
		4	Mostly true - Karibu yote ni kweli
		5	Completely true - Ni kweli kabisa
pnc_q37d	37d. I was comfortable asking questions in the group Nilikuwa huru kuuliza maswali kwenye kikundi	1	Not at all true - Sio kweli hata kidogo
		2	Slightly true - Ni Kweli kwa kiwango kidogo sana
		3	Somewhat true - Yana ukweli fulani
		4	Mostly true - Karibu yote ni kweli
		5	Completely true - Ni kweli kabisa
pnc_q37e	37e. I learned a lot from other women in the group Nilijifunza mengi kutoka kwa wanawake wengine kwenye kikundi	1	Not at all true - Sio kweli hata kidogo
		2	Slightly true - Ni Kweli kwa kiwango kidogo sana
		3	Somewhat true - Yana ukweli fulani
		4	Mostly true - Karibu yote ni kweli
		5	Completely true - Ni kweli kabisa
pnc_q37f	37f. Participating in the group changed the way I think about parenting Kushiriki katika kikundi kulibadilisha namna nafikiria kuhusu malezi ya watoto	1	Not at all true - Sio kweli hata kidogo
		2	Slightly true - Ni Kweli kwa kiwango kidogo sana
		3	Somewhat true - Yana ukweli fulani
		4	Mostly true - Karibu yote ni kweli
		5	Completely true - Ni kweli kabisa
pnc_q37g	37g. Participating in the group changed the way I think about family planning Kushiriki katika kikundi kulibadilisha namna nafikiria kuhusu upangaji uzazi	1	Not at all true - Sio kweli hata kidogo
		2	Slightly true - Ni Kweli kwa kiwango kidogo sana
		3	Somewhat true - Yana ukweli fulani
		4	Mostly true - Karibu yote ni kweli
		5	Completely true - Ni kweli kabisa
pnc_q37h	37h. Being part of the group helped make parenting less stressful Kuwa miongoni mwa kikundi kulisaidia kupunguza mafadhaiko mengi katika kazi ya kulea mwana	1	Not at all true - Sio kweli hata kidogo
		2	Slightly true - Ni Kweli kwa kiwango kidogo sana
		3	Somewhat true - Yana ukweli fulani
		4	Mostly true - Karibu yote ni kweli
		5	Completely true - Ni kweli kabisa
pnc_q38a	38a. During pregnancy Wakati wa ujauzito	1	Yes - Ndio
		2	No - La
pnc_q38b	38b. After pregnancy Baada ya ujauzito	1	Yes - Ndio
		2	No - La
pnc_q38c	38c. Did you phone or send a text message or both Ulimpigia au ulimtumia ujumbe mfupi au yote?	1	Phone - Nilimpigia simu
		2	Text - Nilimtumia ujumbe mfupi
		3	Both - Nilifanya yote mawili
pnc_q39	39. Did you ever share a ride with another pregnant woman you knew to an ANC visit or to the clinic in the year since your baby was born? Uliwahi kupanda mbinu ya usafiri pamoja na mwanamke mwingine mjamzito ambaye ulikuwa unamfahamu kuenda katika ziada y	1	Yes - Ndio
		2	No - La
pnc_q40	40. After being enrolled in this study did you ever attend any group ANC or Healthy Mother Healthy Baby meetings at the facility? Baada ya kusajiliwa katika utafiti huu uliwahi kuhudhuria ANC ya kikundi au mikutano ya mama mwenye Afya mtoto mwenye Afy	1	Yes - Ndio
		2	No - La
pnc_q41	41. Did that group have a name Je Kikundi hicho kilikuwa na jina	1	Yes has a name - Ndio kina jina
		2	No does not have a name - La hakina jina
pnc_q42	42. Either when you were pregnant or in the past year how often did you communicate with women in your group outside of meeting time? Aidha wakati ulikuwa mjamzito au ndani ya mwaka uliopita ni mara ngapi uliwasiliana na wanawake wa kikundi chako nje ya	1	Never - La hasha
		2	Rarely/not very often - Mara chache sana
		3	Sometimes/occasionally - Wakati mwingine/muda kwa muda
		4	Regularly/on a monthly basis - Wakati mwingine/mara moja kwa mwezi
		5	Regularly/on a weekly basis - Mara nyingi/mara moja kwa wiki
		6	More frequently/almost daily - Sana /karibu kila siku
pnc_q43___1	43. Which of the following did you use to communicate with other women in your group? Ni nini kati ya yafuatayo uliyotumia kuwasiliana na wanawake wengine katika kikundi chako? (choice=Phone - Simu)	0	Unchecked
		1	Checked
pnc_q43___2	43. Which of the following did you use to communicate with other women in your group? Ni nini kati ya yafuatayo uliyotumia kuwasiliana na wanawake wengine katika kikundi chako? (choice=Text - Ujumbe mfupi)	0	Unchecked
		1	Checked
pnc_q43___3	43. Which of the following did you use to communicate with other women in your group? Ni nini kati ya yafuatayo uliyotumia kuwasiliana na wanawake wengine katika kikundi chako? (choice=WhatsApp)	0	Unchecked
		1	Checked
pnc_q43___4	43. Which of the following did you use to communicate with other women in your group? Ni nini kati ya yafuatayo uliyotumia kuwasiliana na wanawake wengine katika kikundi chako? (choice=Another social media app - Kwenye mtandao mwingine wa kijamii )	0	Unchecked
		1	Checked
pnc_q43___5	43. Which of the following did you use to communicate with other women in your group? Ni nini kati ya yafuatayo uliyotumia kuwasiliana na wanawake wengine katika kikundi chako? (choice=Social gatherings - Mikutano ya kijamii)	0	Unchecked
		1	Checked
pnc_q43___6	43. Which of the following did you use to communicate with other women in your group? Ni nini kati ya yafuatayo uliyotumia kuwasiliana na wanawake wengine katika kikundi chako? (choice=Any other ways - Njia nyingine)	0	Unchecked
		1	Checked
pnc_q44___1	44. Which of the following things did you communicate about Ni mambo gani mlizungumzia kati ya yafuatayo (choice=Upcoming meetings for example to remind each other of the meeting see if they were planning to attend or set up a shared ride - Mikutano i	0	Unchecked
		1	Checked
pnc_q44___2	44. Which of the following things did you communicate about Ni mambo gani mlizungumzia kati ya yafuatayo (choice=A problem you or others in the group were having - Tatizo aidha wewe au wenzako walikuwa nalo)	0	Unchecked
		1	Checked
pnc_q44___3	44. Which of the following things did you communicate about Ni mambo gani mlizungumzia kati ya yafuatayo (choice=Help that you or others in the group needed - Peana msaada ambao wewe au wengine katika kikundi mlihitaji)	0	Unchecked
		1	Checked
pnc_q44___4	44. Which of the following things did you communicate about Ni mambo gani mlizungumzia kati ya yafuatayo (choice=Advice/information related to pregnancy - Ushauri/habari ihusianayo na ujauzito)	0	Unchecked
		1	Checked
pnc_q44___5	44. Which of the following things did you communicate about Ni mambo gani mlizungumzia kati ya yafuatayo (choice=Advice/information related to family planning - Ushauri/habari ihusianayo na upangaji uzazi)	0	Unchecked
		1	Checked
pnc_q44___6	44. Which of the following things did you communicate about Ni mambo gani mlizungumzia kati ya yafuatayo (choice=Advice/information related to parenting - Ushauri/habari ihusianayo na uzazi)	0	Unchecked
		1	Checked
pnc_q44___7	44. Which of the following things did you communicate about Ni mambo gani mlizungumzia kati ya yafuatayo (choice=Advice/information related to infant/child care practices or health - Ushauri/habari ihusianayo na afya/malezi ya watoto au watoto wachanga)	0	Unchecked
		1	Checked
pnc_q44___8	44. Which of the following things did you communicate about Ni mambo gani mlizungumzia kati ya yafuatayo (choice=Other - Nyingine )	0	Unchecked
		1	Checked
pnc_q45	45. Do you think a woman would reach out to other members of the group if she had a problem or needed help? Unadhani mwanamke anaweza kujisikia huru kuzungumza na wanawake wenzake katika kikundi iwapo ana tatizo au anahitaji usaidizi?	1	Yes - Ndio
		2	No - La
		3	Unsure - Sina Uhakika
pnc_q45a	45a. If yes do you know of specific examples when this has happened Unafahamu mifano mahususi ya lini haya yalifanyika?	1	Yes - Ndio
		2	No - La
		3	Unsure - Sina Uhakika
pnc_q46a	46a. I have heard people say things about family planning methods being harmful or dangerous Nimeskia watu wakisema kuwa mbinu za upangaji uzazi ni hatari au zina madhara	1	Not at all true - Sio kweli hata kidogo
		2	Slightly true - Ni Kweli kwa kiwango kidogo sana
		3	Somewhat true - Yana ukweli fulani
		4	Mostly true - Karibu yote ni kweli
		5	Completely true - Ni kweli kabisa
pnc_q46b	46b. In the last year I have had questions or concerns about the safety of family planning methods Kwenye mwaka uliopita nimekuwa na maswali au wasiwasi kuhusu usalama wa mbinu za upangaji uzazi	1	Not at all true - Sio kweli hata kidogo
		2	Slightly true - Ni Kweli kwa kiwango kidogo sana
		3	Somewhat true - Yana ukweli fulani
		4	Mostly true - Karibu yote ni kweli
		5	Completely true - Ni kweli kabisa
pnc_q46c	46c. In the last year I have discussed concerns or questions I had about the safety of family planning methods with a provider Kwenye mwaka uliopita nimejadili na mhudumu kuhusu wasiwasi au maswali niliyokuwa nayo kuhusu usalama wa mbinu za upangaji uza	1	Not at all true - Sio kweli hata kidogo
		2	Slightly true - Ni Kweli kwa kiwango kidogo sana
		3	Somewhat true - Yana ukweli fulani
		4	Mostly true - Karibu yote ni kweli
		5	Completely true - Ni kweli kabisa
pnc_q46d	46d. In the last year I have discussed concerns or questions I had about the safety of family planning methods with other women Kwenye mwaka uliopita nimejadili na wanawake wengine kuhusu wasiwasi au maswali niliyokuwa nayo kuhusu usalama wa mbinu za u	1	Not at all true - Sio kweli hata kidogo
		2	Slightly true - Ni Kweli kwa kiwango kidogo sana
		3	Somewhat true - Yana ukweli fulani
		4	Mostly true - Karibu yote ni kweli
		5	Completely true - Ni kweli kabisa
pnc_q46e	46e. In the last year conversations with women whove had positive experiences with family planning methods have influenced my thinking about family planning Kwenye mwaka uliopita majadiliano na wanawake wengine ambao wamepitia mema na mbinu za upangaji	1	Not at all true - Sio kweli hata kidogo
		2	Slightly true - Ni Kweli kwa kiwango kidogo sana
		3	Somewhat true - Yana ukweli fulani
		4	Mostly true - Karibu yote ni kweli
		5	Completely true - Ni kweli kabisa
pnc_q46f	46f. In the last year I have received or gathered all the information I need to make a decision about if and how to space my next pregnancy Kwenye mwaka uliopita nimepokea au kukusanya habari zote nilizozihitaji kufanya maamuzi iwapo nitataka kupata mim	1	Not at all true - Sio kweli hata kidogo
		2	Slightly true - Ni Kweli kwa kiwango kidogo sana
		3	Somewhat true - Yana ukweli fulani
		4	Mostly true - Karibu yote ni kweli
		5	Completely true - Ni kweli kabisa
pnc_q46g	46g. In interactions with health care providers in the last year I was given the opportunity to ask questions about family planning methods Katika kukutana and kuwasiliana kwangu na wahudumu wa Afya kwenye mwaka uliopita nilipewa nafasi ya kuuliza maswa	1	Not at all true - Sio kweli hata kidogo
		2	Slightly true - Ni Kweli kwa kiwango kidogo sana
		3	Somewhat true - Yana ukweli fulani
		4	Mostly true - Karibu yote ni kweli
		5	Completely true - Ni kweli kabisa
pnc_q46h	46h. In interactions with health care providers in the last year all of my questions about family planning were answered in a way I understood Katika kukutana na kuwasiliana kwangu na wahudumu wa Afya kwenye mwaka uliopita maswali yangu yote kuhusu upan	1	Not at all true - Sio kweli hata kidogo
		2	Slightly true - Ni Kweli kwa kiwango kidogo sana
		3	Somewhat true - Yana ukweli fulani
		4	Mostly true - Karibu yote ni kweli
		5	Completely true - Ni kweli kabisa
pnc_q47a	47a. Mom will be healthier/ less likely to have problems Mama atakuwa mwenye afya/ uwezekano mchache wa kupatwa na matatizo	1	Agree - Nakubali
		2	Disagree - Sikubali
		3	Neither agree nor disagree - Sina maoni
pnc_q47b	47b. Current Baby will be healthier/ less likely to have problems Mtoto wa hivi sasa atakuwa mwenyeAfya/ uwezekano mchache wa kupatwa na matatizo	1	Agree - Nakubali
		2	Disagree - Sikubali
		3	Neither agree nor disagree - Sina maoni
pnc_q47c	47c. Next baby will be healthier/less likely to have problem Mtoto atakayefuata atakuwa mwenye Afya/ uwezekano mchache wa kupatwa na matatizo	1	Agree - Nakubali
		2	Disagree - Sikubali
		3	Neither agree nor disagree - Sina maoni
pnc_q47d	47d. Easier to feed and/or take care of other children Ni Rahisi kulisha/au kulea watoto wengine	1	Agree - Nakubali
		2	Disagree - Sikubali
		3	Neither agree nor disagree - Sina maoni
pnc_q47e	47e. Saves money Inaokoa pesa	1	Agree - Nakubali
		2	Disagree - Sikubali
		3	Neither agree nor disagree - Sina maoni
pnc_q48	48. After delivering a baby for the best health of the mother and baby how long should a woman wait until getting pregnant again? Baada ya kujifungua mtoto kwa Afya nzuri ya mama na mtoto ni muda upi mwanamke anastahili kusubiri kabla ya kupata ujauzi
pnc_q49	49. After the birth of a child can a woman become pregnant before her menstrual period has returned? Baada ya kuzaliwa kwa mtoto mwanamke anaweza kupata ujauzito kabla hedhi yake kurejea?	1	Yes - Ndio
		2	No - La
		3	Dont know/Unsure - Sijui/Sina Uhakika
pnc_q50a	50a. Habiba only gives her baby breastmilk but her mother in law also gives the baby water and thin porridge sometimes. To prevent pregnancy should Habiba choose a different family planning method? Habiba anamnyonyesha mwanawe kama njia ya kipekee laki	1	Yes - Ndio
		2	No - La
		3	Not sure/Dont know - Sina Uhakika/Sijui
pnc_q50b	50b. Can she continue to use LAM as a family planning method after she sees her first menses/monthly bleeding? Anaweza kuendelea kutumia LAM kama mbinu ya upangaji uzazi baada ya kupokea hedhi yake ya kwanza	1	Yes - Ndio
		2	No - La
		3	Not sure/Dont know - Sina Uhakika/Sijui
pnc_q50c	50c. What is the oldest her baby can be before LAM is no longer a good option for Habiba? Mtoto wake anastahili kufikia umri gani ndipo kabla njia ya kupanga uzazi ya LAM haitamfaa Habiba?
pnc_q51	51. During pregnancy did you form a plan to deliver at a facility and start a contraceptive before leaving for example getting an IUD or implant after delivery and before leaving the facility? Wakati wa ujauzito ulitengeneza mpango wa kujifungulia kat	1	Yes - Ndio
		2	No - La
pnc_q51a	51a. What was your method choice Mbinu yako uliyochagua ilikuwa ipi?	1	IUCD insertion - Kuwekwa IUCD
		2	Implant insertion - Kuwekwa kipandikizi
		3	Progesterone only pill - Tembe ya Progesterone pekee
		4	Tubal ligation - Kufunga tubu
		5	Other - Nyingine
pnc_q51b	51b. Did you receive this method prior to leaving the hospital after birth Ulipokea mbinu hii kabla ya kutoka kwenye kituo cha afya baada ya kujifungua?	1	Yes - Ndio
		2	No - La
pnc_q51b_1	51b1. If No why not Iwapo La kwa nini?	1	I forgot - Nilisahau
		2	Changed my mind - Nilibadilisha nia
		3	The method wasnt available - Mbinu ya kupanga uzazi niliotaka haikuwa inapatikana
		4	Provider did not know how to insert - Mhudumu hakufahamu namna ya kuiweka
		5	Provider thought I should wait - Mhudumu alipendekeza ningoje
		6	Husband or mother in law disagreed - Mme/mama mkwe hawakukubaliana na maoni yangu
		7	Didnt end up delivering in a facility - Sikujifungulia kwenye kituo cha afya
		8	Other - Nyingine
pnc_q54	54. Since the birth of [pnc_q3] have you experienced any other pregnancy Tangu [pnc_q3] kuzaliwa umekuwa na ujauzito mwingine tena?	1	Yes - Ndio
		2	No - La
pnc_q54a	54a. How old was your baby when you became pregnant Mtoto wako alikuwa na umri upi ulipopata ujauzito?
pnc_q54b	54b. Are you currently pregnant Una ujauzito sasa hivi?	1	Yes - Ndio
		2	No - La
		3	Unsure - Sina Uhakika
pnc_q54c_i	54c. When did the pregnancy end? Ujauzito ulikamilika lini?	{REDACTED}
pnc_q54c_1_months	Number of months after birth of baby
pnc_q54c_ii	54cii. How did the pregnancy end Ujauzito ulikamilika vipi?	1	Miscarriage - Mimba kuharibika
		2	Termination - Kuavya mimba
		3	Birth - Kujifungua
pnc_q55	55. If it were up to you which of the following would you prefer Iwapo ingekuwa juu yako ni yepi kati yafuatayo ungependelea?	1	Not ever getting pregnant again - Kamwe kutokuwa na ujauzito mwingine
		2	Having another child but not getting pregnant right now - Kuwa na mtoto mwingine lakini sio kupata mimba sasa hivi
		3	Getting pregnant as soon as possible - Kupata ujauzito haraka iwezekanavyo
		4	Undecided - Sijaamua
		5	NA: Currently pregnant - Mimi nimjamzito sasa hivi
pnc_q52	52. In what month did your mesntrual period return after having your baby Ni mwezi upi ambao hedhi yako ilirejea baada ya kujifungua mtoto?	{REDACTED}
pnc_q53	53. In what month did you and your husband/partner first have sexual intercourse again after having your baby? Ni mwezi upi ambapo wewe na mumeo/mwenza wako mlishiriki ngono kwa mara ya kwanza baada ya kupata mtoto?	{REDACTED}
pnc_q53num_months	Number of months after birth of baby
pnc_q56	56. In the last 12 months since your baby was born have you used any method of family planning to prevent pregnancy Ndani ya miezi 12 tangu mtoto wako kuzaliwa umetumia mbinu ya upangaji uzazi kuzuia kupata mimba?	1	Yes - Ndio
		2	No - La
pnc_q56a___1	56a. What factors contributed to you not using a form of family planning? Ni sababu zipi zilichangia wewe kututotumia mbinu ya upangaji uzazi?[ (choice=Does not want to space next pregnancy/wants to get pregnant again right away - Sitaki kupeana nafasikat	0	Unchecked
		1	Checked
pnc_q56a___2	56a. What factors contributed to you not using a form of family planning? Ni sababu zipi zilichangia wewe kututotumia mbinu ya upangaji uzazi?[ (choice=Infrequent sex/husband or partner away - Sishiriki ngono mara kwa mara/ mume/mwenzangu yuko mbali)	0	Unchecked
		1	Checked
pnc_q56a___3	56a. What factors contributed to you not using a form of family planning? Ni sababu zipi zilichangia wewe kututotumia mbinu ya upangaji uzazi?[ (choice=Not having sex - Sishiriki ngono )	0	Unchecked
		1	Checked
pnc_q56a___4	56a. What factors contributed to you not using a form of family planning? Ni sababu zipi zilichangia wewe kututotumia mbinu ya upangaji uzazi?[ (choice=Cant get pregnant - Siwezi kupata ujauzito)	0	Unchecked
		1	Checked
pnc_q56a___5	56a. What factors contributed to you not using a form of family planning? Ni sababu zipi zilichangia wewe kututotumia mbinu ya upangaji uzazi?[ (choice=Breastfeeding - Ninanyonyesha)	0	Unchecked
		1	Checked
pnc_q56a___6	56a. What factors contributed to you not using a form of family planning? Ni sababu zipi zilichangia wewe kututotumia mbinu ya upangaji uzazi?[ (choice=Fatalistic/up to God - Nimemwachia Mungu)	0	Unchecked
		1	Checked
pnc_q56a___7	56a. What factors contributed to you not using a form of family planning? Ni sababu zipi zilichangia wewe kututotumia mbinu ya upangaji uzazi?[ (choice=Has not menstruated since last birth - Hajapokea hedhi tangu kujifungua kulikopita)	0	Unchecked
		1	Checked
pnc_q56a___8	56a. What factors contributed to you not using a form of family planning? Ni sababu zipi zilichangia wewe kututotumia mbinu ya upangaji uzazi?[ (choice=Husband/partner opposed - Mme/mwenza hakubaliani )	0	Unchecked
		1	Checked
pnc_q56a___9	56a. What factors contributed to you not using a form of family planning? Ni sababu zipi zilichangia wewe kututotumia mbinu ya upangaji uzazi?[ (choice=Respondent opposed - Anayejibu alipinga)	0	Unchecked
		1	Checked
pnc_q56a___25	56a. What factors contributed to you not using a form of family planning? Ni sababu zipi zilichangia wewe kututotumia mbinu ya upangaji uzazi?[ (choice=Others opposed - Wengine walipinga)	0	Unchecked
		1	Checked
pnc_q56a___10	56a. What factors contributed to you not using a form of family planning? Ni sababu zipi zilichangia wewe kututotumia mbinu ya upangaji uzazi?[ (choice=Religious prohibition - Kanisa imekataza)	0	Unchecked
		1	Checked
pnc_q56a___11	56a. What factors contributed to you not using a form of family planning? Ni sababu zipi zilichangia wewe kututotumia mbinu ya upangaji uzazi?[ (choice=Knows no method - Hafahamu mbinu)	0	Unchecked
		1	Checked
pnc_q56a___12	56a. What factors contributed to you not using a form of family planning? Ni sababu zipi zilichangia wewe kututotumia mbinu ya upangaji uzazi?[ (choice=Knows no source (place to get FP) - Hafahamu mahali (mahali pa kupata huduma ya FP))	0	Unchecked
		1	Checked
pnc_q56a___13	56a. What factors contributed to you not using a form of family planning? Ni sababu zipi zilichangia wewe kututotumia mbinu ya upangaji uzazi?[ (choice=Concerned about side effects/heard rumours about dangers/health concerns - Wasiwasi kuhusu athari zake/	0	Unchecked
		1	Checked
pnc_q56a___14	56a. What factors contributed to you not using a form of family planning? Ni sababu zipi zilichangia wewe kututotumia mbinu ya upangaji uzazi?[ (choice=Lack of access/too far - Hawezi kufikia kituo kinachozipeana/Ziko mbali sana)	0	Unchecked
		1	Checked
pnc_q56a___15	56a. What factors contributed to you not using a form of family planning? Ni sababu zipi zilichangia wewe kututotumia mbinu ya upangaji uzazi?[ (choice=The cost is too much - Ni ghali mno)	0	Unchecked
		1	Checked
pnc_q56a___16	56a. What factors contributed to you not using a form of family planning? Ni sababu zipi zilichangia wewe kututotumia mbinu ya upangaji uzazi?[ (choice=The preferred method not available - Mbinu anayopendelea haipatikani)	0	Unchecked
		1	Checked
pnc_q56a___17	56a. What factors contributed to you not using a form of family planning? Ni sababu zipi zilichangia wewe kututotumia mbinu ya upangaji uzazi?[ (choice=No method available - Hakuna mbinu zozote haikupatikana)	0	Unchecked
		1	Checked
pnc_q56a___18	56a. What factors contributed to you not using a form of family planning? Ni sababu zipi zilichangia wewe kututotumia mbinu ya upangaji uzazi?[ (choice=Inconvenient to use - Sio rahisi kutumia)	0	Unchecked
		1	Checked
pnc_q56a___19	56a. What factors contributed to you not using a form of family planning? Ni sababu zipi zilichangia wewe kututotumia mbinu ya upangaji uzazi?[ (choice=Interferes with bodys normal processes - Inaathiri utendakazi wa kawaida wa mwili)	0	Unchecked
		1	Checked
pnc_q56a___20	56a. What factors contributed to you not using a form of family planning? Ni sababu zipi zilichangia wewe kututotumia mbinu ya upangaji uzazi?[ (choice=Health centre was not open - Kituo cha Afya hakikuwa kimefunguliwa)	0	Unchecked
		1	Checked
pnc_q56a___21	56a. What factors contributed to you not using a form of family planning? Ni sababu zipi zilichangia wewe kututotumia mbinu ya upangaji uzazi?[ (choice=Health provider was unfriendly - Mhudumu wa Afya alikuwa mkali)	0	Unchecked
		1	Checked
pnc_q56a___22	56a. What factors contributed to you not using a form of family planning? Ni sababu zipi zilichangia wewe kututotumia mbinu ya upangaji uzazi?[ (choice=Health provider dissuaded me from using - Mhudumu wa Afya alinishawishi kutotumia)	0	Unchecked
		1	Checked
pnc_q56a___23	56a. What factors contributed to you not using a form of family planning? Ni sababu zipi zilichangia wewe kututotumia mbinu ya upangaji uzazi?[ (choice=Couldnt decide on a method - Sikuamua ni mbinu ipi nitatumia)	0	Unchecked
		1	Checked
pnc_q56a___24	56a. What factors contributed to you not using a form of family planning? Ni sababu zipi zilichangia wewe kututotumia mbinu ya upangaji uzazi?[ (choice=Other - Nyingine)	0	Unchecked
		1	Checked
pnc_q57	57. Are you currently using a family planning method to prevent pregnancy Kwa sasa hivi unatumia mbinu ya upangaji uzazi kuzuia ujauzito?	1	Yes - Ndio
		2	No - La
pnc_q57i_a___1	57ia. What method(s) are you currently using Ni mbinu ipi/zipi unazozitumia? (choice=LAM/breastfeeding - LAM/Kunyonyesha )	0	Unchecked
		1	Checked
pnc_q57i_a___2	57ia. What method(s) are you currently using Ni mbinu ipi/zipi unazozitumia? (choice=Calendar/rhythm/cycle beads/natural/Billings method - Kalenda/mrindimo/ushanga/asilia/mbinu ya Billing)	0	Unchecked
		1	Checked
pnc_q57i_a___3	57ia. What method(s) are you currently using Ni mbinu ipi/zipi unazozitumia? (choice=Withdrawal - Kuondoa )	0	Unchecked
		1	Checked
pnc_q57i_a___4	57ia. What method(s) are you currently using Ni mbinu ipi/zipi unazozitumia? (choice=Condoms - Mpira)	0	Unchecked
		1	Checked
pnc_q57i_a___5	57ia. What method(s) are you currently using Ni mbinu ipi/zipi unazozitumia? (choice=Oral contraceptives - Dawa za kumeza)	0	Unchecked
		1	Checked
pnc_q57i_a___6	57ia. What method(s) are you currently using Ni mbinu ipi/zipi unazozitumia? (choice=Injectables - Sindano)	0	Unchecked
		1	Checked
pnc_q57i_a___7	57ia. What method(s) are you currently using Ni mbinu ipi/zipi unazozitumia? (choice=Implants - Kipandikizi)	0	Unchecked
		1	Checked
pnc_q57i_a___8	57ia. What method(s) are you currently using Ni mbinu ipi/zipi unazozitumia? (choice=IUD)	0	Unchecked
		1	Checked
pnc_q57i_a___9	57ia. What method(s) are you currently using Ni mbinu ipi/zipi unazozitumia? (choice=Emergency pill - Tembe ya dharura )	0	Unchecked
		1	Checked
pnc_q57i_a___10	57ia. What method(s) are you currently using Ni mbinu ipi/zipi unazozitumia? (choice=Sterilisation - Kufisha vidudu )	0	Unchecked
		1	Checked
pnc_q57i_a___11	57ia. What method(s) are you currently using Ni mbinu ipi/zipi unazozitumia? (choice=Other - Nyingine)	0	Unchecked
		1	Checked
pnc_q57i_b	57ib. Does your husband/partner know that you are currently using a method of family planning Mumeo/mwenzaako anafahamu kuwa sasa hivi unatumia mbinu ya upangaji uzazi?	1	Yes - Ndio
		2	No - La
pnc_q57i_bi	57ib_a. Did you discuss together with your husband/partner before you started with this method Ulijadili pamoja na mme/mwenza wako kabla ya kuanza kutumia mbinu hii	1	Yes we discussed family planning generally - Ndio tulijadili upangaji uzazi kwa jumla
		2	Yes we discussed the specific family planning method - Ndio tulijadili mbinu hii mahususi
		3	No we did not discuss beforehand - La hatukujadili kabla
pnc_q58_lam	58. When did you begin using your current/most recent method - LAM/Breastfeeding Ulianza lini kutumia mbinu hii yako ya hivi sasa/ya hivi karibuni - LAM/Kunyonyesha?	{REDACTED}
pnc_q58_lam_months	Number of months after birth of baby
pnc_q62_lam___1	62. What factors contributed to your current/most recent method choice - LAM/Breastfeeding Ni sababu zipi zilichangia chaguo lako la mbinu ya sasa/ya hivi karibuni - LAM/Kunyonyesha? (choice=Convenience of obtaining method - Urahisi wa kupata mbinu ya k	0	Unchecked
		1	Checked
pnc_q62_lam___2	62. What factors contributed to your current/most recent method choice - LAM/Breastfeeding Ni sababu zipi zilichangia chaguo lako la mbinu ya sasa/ya hivi karibuni - LAM/Kunyonyesha? (choice=Easy/convenient to use - Rahisi/ Matumizi ya kufana)	0	Unchecked
		1	Checked
pnc_q62_lam___3	62. What factors contributed to your current/most recent method choice - LAM/Breastfeeding Ni sababu zipi zilichangia chaguo lako la mbinu ya sasa/ya hivi karibuni - LAM/Kunyonyesha? (choice=Availability - Upatikanaji)	0	Unchecked
		1	Checked
pnc_q62_lam___4	62. What factors contributed to your current/most recent method choice - LAM/Breastfeeding Ni sababu zipi zilichangia chaguo lako la mbinu ya sasa/ya hivi karibuni - LAM/Kunyonyesha? (choice=Cost is not too much/free - Sio ghali mno/ni bure)	0	Unchecked
		1	Checked
pnc_q62_lam___5	62. What factors contributed to your current/most recent method choice - LAM/Breastfeeding Ni sababu zipi zilichangia chaguo lako la mbinu ya sasa/ya hivi karibuni - LAM/Kunyonyesha? (choice=Preferred method selected during pregnancy - Mbinu pendwa nili	0	Unchecked
		1	Checked
pnc_q62_lam___6	62. What factors contributed to your current/most recent method choice - LAM/Breastfeeding Ni sababu zipi zilichangia chaguo lako la mbinu ya sasa/ya hivi karibuni - LAM/Kunyonyesha? (choice=Considered the most effective method - Inajulikana kama mbinu	0	Unchecked
		1	Checked
pnc_q62_lam___7	62. What factors contributed to your current/most recent method choice - LAM/Breastfeeding Ni sababu zipi zilichangia chaguo lako la mbinu ya sasa/ya hivi karibuni - LAM/Kunyonyesha? (choice=Unlikely to be bothered by side effects - Uwezekano mdogo wa k	0	Unchecked
		1	Checked
pnc_q62_lam___8	62. What factors contributed to your current/most recent method choice - LAM/Breastfeeding Ni sababu zipi zilichangia chaguo lako la mbinu ya sasa/ya hivi karibuni - LAM/Kunyonyesha? (choice=Felt method was safe/few health concerns - Nilihisi mbinu ilik	0	Unchecked
		1	Checked
pnc_q62_lam___9	62. What factors contributed to your current/most recent method choice - LAM/Breastfeeding Ni sababu zipi zilichangia chaguo lako la mbinu ya sasa/ya hivi karibuni - LAM/Kunyonyesha? (choice=Health provider influenced choice - Mhudumu wa Afya alichangia	0	Unchecked
		1	Checked
pnc_q62_lam___10	62. What factors contributed to your current/most recent method choice - LAM/Breastfeeding Ni sababu zipi zilichangia chaguo lako la mbinu ya sasa/ya hivi karibuni - LAM/Kunyonyesha? (choice=Friends/family influenced choice - Marafiki/familia walichangi	0	Unchecked
		1	Checked
pnc_q62_lam___11	62. What factors contributed to your current/most recent method choice - LAM/Breastfeeding Ni sababu zipi zilichangia chaguo lako la mbinu ya sasa/ya hivi karibuni - LAM/Kunyonyesha? (choice=Husband influenced choice - Mume alichangia uchukuaji wa mbinu	0	Unchecked
		1	Checked
pnc_q62_lam___12	62. What factors contributed to your current/most recent method choice - LAM/Breastfeeding Ni sababu zipi zilichangia chaguo lako la mbinu ya sasa/ya hivi karibuni - LAM/Kunyonyesha? (choice=Women in my ANC/PNC group influenced my choice - Wanawake kati	0	Unchecked
		1	Checked
pnc_q62_lam___13	62. What factors contributed to your current/most recent method choice - LAM/Breastfeeding Ni sababu zipi zilichangia chaguo lako la mbinu ya sasa/ya hivi karibuni - LAM/Kunyonyesha? (choice=Other - Nyingine)	0	Unchecked
		1	Checked
pnc_q58_cal	58. When did you begin using your current/most recent method - Calendar/Rhythm/Cycle BeadsUlianza lini kutumia mbinu hii yako ya hivi sasa/ya hivi karibuni - Kalenda/mrindimo/ushanga/asilia/mbinu ya Billing?	{REDACTED}
pnc_q58_cal_months	Number of months after birth of baby
pnc_q62_cal___1	62. What factors contributed to your current/most recent method choice - Calendar/Rhythm/Cycle BeadsNi sababu zipi zilichangia chaguo lako la mbinu ya sasa/ya hivi karibuni - Kalenda/mrindimo/ushanga/asilia/mbinu ya Billing? (choice=Convenience of obtaini	0	Unchecked
		1	Checked
pnc_q62_cal___2	62. What factors contributed to your current/most recent method choice - Calendar/Rhythm/Cycle BeadsNi sababu zipi zilichangia chaguo lako la mbinu ya sasa/ya hivi karibuni - Kalenda/mrindimo/ushanga/asilia/mbinu ya Billing? (choice=Easy/convenient to use	0	Unchecked
		1	Checked
pnc_q62_cal___3	62. What factors contributed to your current/most recent method choice - Calendar/Rhythm/Cycle BeadsNi sababu zipi zilichangia chaguo lako la mbinu ya sasa/ya hivi karibuni - Kalenda/mrindimo/ushanga/asilia/mbinu ya Billing? (choice=Availability - Upatika	0	Unchecked
		1	Checked
pnc_q62_cal___4	62. What factors contributed to your current/most recent method choice - Calendar/Rhythm/Cycle BeadsNi sababu zipi zilichangia chaguo lako la mbinu ya sasa/ya hivi karibuni - Kalenda/mrindimo/ushanga/asilia/mbinu ya Billing? (choice=Cost is not too much/f	0	Unchecked
		1	Checked
pnc_q62_cal___5	62. What factors contributed to your current/most recent method choice - Calendar/Rhythm/Cycle BeadsNi sababu zipi zilichangia chaguo lako la mbinu ya sasa/ya hivi karibuni - Kalenda/mrindimo/ushanga/asilia/mbinu ya Billing? (choice=Preferred method selec	0	Unchecked
		1	Checked
pnc_q62_cal___6	62. What factors contributed to your current/most recent method choice - Calendar/Rhythm/Cycle BeadsNi sababu zipi zilichangia chaguo lako la mbinu ya sasa/ya hivi karibuni - Kalenda/mrindimo/ushanga/asilia/mbinu ya Billing? (choice=Considered the most ef	0	Unchecked
		1	Checked
pnc_q62_cal___7	62. What factors contributed to your current/most recent method choice - Calendar/Rhythm/Cycle BeadsNi sababu zipi zilichangia chaguo lako la mbinu ya sasa/ya hivi karibuni - Kalenda/mrindimo/ushanga/asilia/mbinu ya Billing? (choice=Unlikely to be bothere	0	Unchecked
		1	Checked
pnc_q62_cal___8	62. What factors contributed to your current/most recent method choice - Calendar/Rhythm/Cycle BeadsNi sababu zipi zilichangia chaguo lako la mbinu ya sasa/ya hivi karibuni - Kalenda/mrindimo/ushanga/asilia/mbinu ya Billing? (choice=Felt method was safe/f	0	Unchecked
[truncated: 1,509 more rows]
